# Supplementary material for: Agonist Binding to Chemosensory Receptors: A Systematic Bioinformatics Analysis
Source: PubMed Central journal article supplement (PMC5592726; doi:10.3389/fmolb.2017.00063), 2017-09-06
Supplement: DataSheet1.pdf [file DataSheet1.pdf]

# Agonist binding to chemosensory receptors: a systematic bioinformatics analysis

## Supplementary Information

### Part 1

**Fabrizio Fierro<sup>1,†</sup>, Eda Suku<sup>2,†</sup>, Mercedes Alfonso-Prieto<sup>1,3,\*</sup>, Alejandro Giorgetti<sup>1,2,\*</sup>,  
Sven Cichon<sup>4,5,6</sup>, Paolo Carloni<sup>1,7,8</sup>**

<sup>1</sup> Computational Biomedicine, Institute for Advanced Simulation IAS-5 and Institute of Neuroscience and Medicine INM-9, Forschungszentrum Jülich, 52425 Jülich, Germany.

<sup>2</sup> Department of Biotechnology, University of Verona, Ca' Vignal 1, Strada le Grazie 15, 37134 Verona, Italy.

<sup>3</sup> Cécile and Oskar Vogt Institute for Brain Research, Medical Faculty, Heinrich Heine University Düsseldorf, Merowingerplatz 1a, 40225 Düsseldorf, Germany.

<sup>4</sup> Institute of Neuroscience and Medicine INM-1, Forschungszentrum Jülich, 52425 Jülich, Germany.

<sup>5</sup> Institute for Human Genetics, Department of Genomics, Life&Brain Center, University of Bonn, Sigmund-Freud-Straße 25, 53127 Bonn, Germany.

<sup>6</sup> Division of Medical Genetics, Department of Biomedicine, University of Basel, Switzerland.

<sup>7</sup> Department of Physics, Rheinisch-Westfälische Technische Hochschule Aachen, 52062 Aachen, Germany.

<sup>8</sup> VNU Key Laboratory "Multiscale Simulation of Complex Systems", VNU University of Science, Vietnam National University, Hanoi, Viet Nam.

<sup>†</sup> These authors have contributed equally to this work.

**\* Correspondence:**

Mercedes Alfonso-Prieto, [m.alfonso-prieto@fz-juelich.de](mailto:m.alfonso-prieto@fz-juelich.de)

Alejandro Giorgetti, [a.giorgetti@fz-juelich.de](mailto:a.giorgetti@fz-juelich.de)

## Section 1: Homology Modeling

**Section 1.1: Limitations of the bioinformatics models.** Homology modeling is able to automatically predict reliable three-dimensional structures when the sequence identity (SI) between target sequence and possible available templates is over 30% (Chothia and Lesk, 1986; Baker and Sali, 2001; Eramian et al., 2008; Piccoli et al., 2013). However, the SI between hORs/hTAS2Rs and the possible GPCRs templates is lower (13-20%), and thus the side chains of the model's residues are likely to be wrong. Since the orientation of the side chains is key for protein-ligand interactions, the docking results are expected to be affected as well. In this regard, previous studies on GPCR/ligand complexes have suggested that the sequence identity lower threshold for accurate prediction of ligand poses is between 30% (Beuming and Sherman, 2012) and 40% (Kufareva et al., 2011). Moreover, docking algorithms do not take fully into account receptor flexibility and hydration (Katritch et al., 2010; Spyraakis et al., 2011; Spyraakis and Cavasotto, 2015), which is crucial for ligand binding and receptor activation in GPCRs (Angel et al., 2009; Nygaard et al., 2010; Latorraca et al., 2017). Furthermore, docking takes into account only a rough estimation of the binding affinity or the binding energy, which might be misleading in the case of hChem-GPCRs. The promiscuity of hORs and hTAS2Rs has been proposed to rely on a trade-off between an increased ligand receptive range and a reduced ligand affinity, compared to other GPCRs (Lancet et al., 1993; Meyerhof et al., 2010). As a consequence, docking scoring functions may not discriminate well between different tastant or odorant binding poses (Charlier et al., 2013). In addition, in the case of hORs, odorant binding is expected to rely mainly on hydrophobic interactions, which are not directional, and thus may be difficult to describe with traditional scoring functions, as discussed in references (Gelis et al., 2012; Charlier et al., 2013). Finally, it has been pointed out that ligand binding in hChem-GPCRs may not be fully well described using the “static” picture of docking poses, due to the flexibility of odorants and bitter tastants; instead, a “dynamical” interaction pattern should be considered by performing molecular dynamics (MD) simulations (Gelis et al., 2012; Sandal et al., 2015).

## Section 1.2: Multiple sequence alignments of hChem-GPCRs.

**Supplementary Figure 1. Sequence logos of (a) hTAS2Rs and (b) hORs, based on the multiple sequence alignments (MSAs) of each human chemosensory receptor subfamily.** The first N-terminal residues (28 for hTAS2Rs and 32 for hORs) have been omitted for the sake of clarity; the same was done for the last C-terminal positions (9 and 101, respectively). These segments are well outside the seven transmembrane bundle of GPCRs. The full-length MSAs can be obtained from the authors upon request.

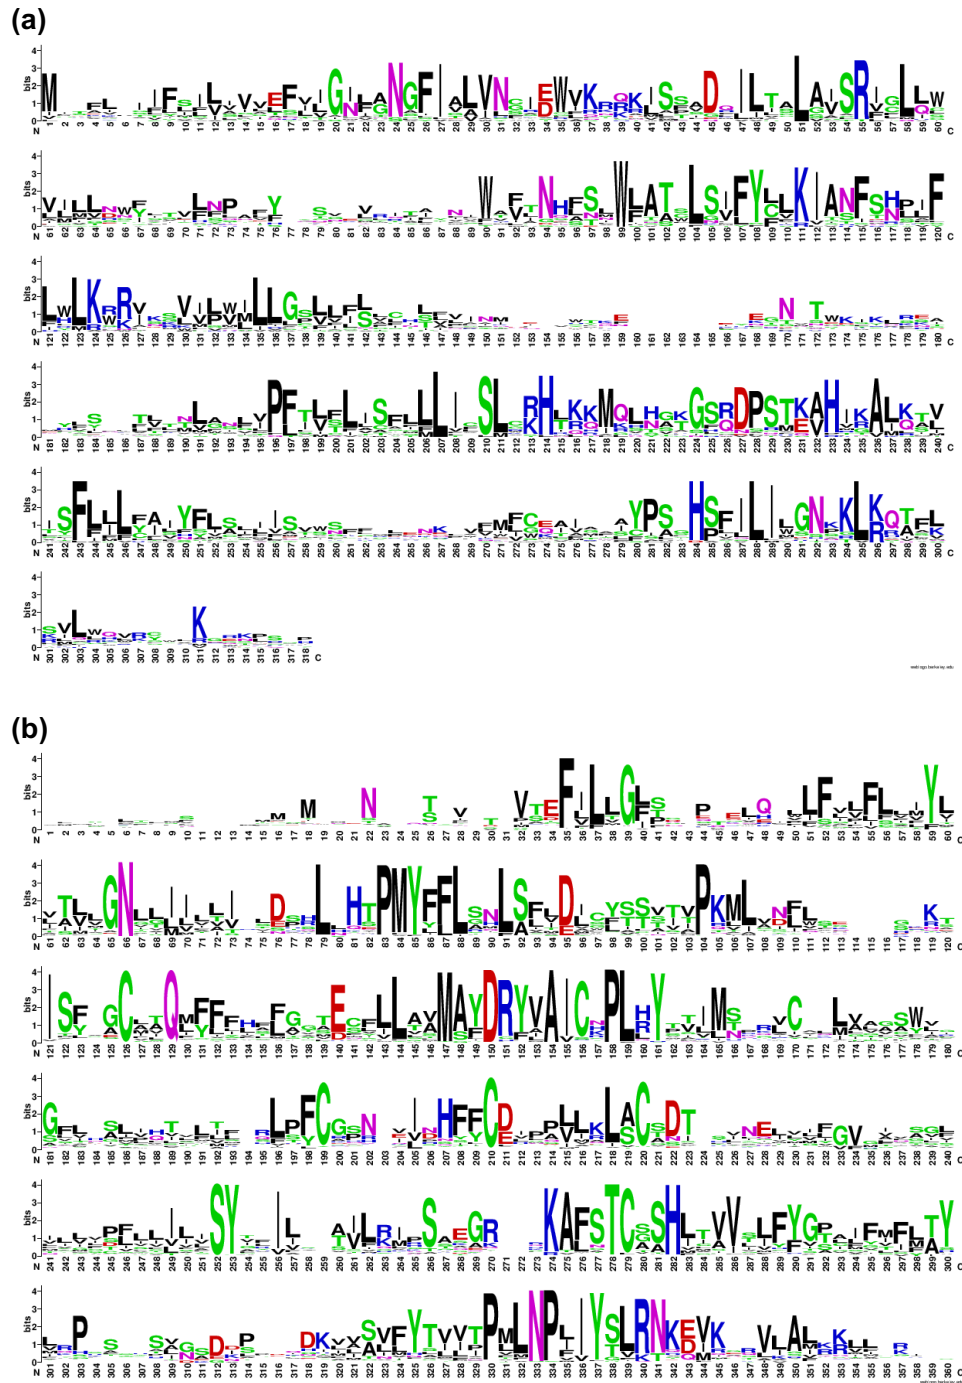

**Section 1.3: Target-template pairwise alignments.** The HMM-based pairwise alignment between each of the hChem-GPCRs studied in this work and the template ( $\beta$ 2-adrenoceptor, PDB code 4LDE) are provided below in PIR format.

>P1;tas2r1

sequence:tas2r1: : : : : 0.00: 0.00

LESHLI IYFLLAVIQFLLGIFTNGI I VVVNGIDLIKHRKMAPL D L L SCLAVSRIFLQLFIFVNVVIVI  
FF --- IEFIMCSANCAILLFINELELWLATWLGVFYCAKVASVRHPLFIWLKMRISKLVPMILGSL  
YVSMICVFHYAGFMVPYFLRKFFSQNATI QKE-DTLAIQIFSFVAEFSVPLLI FLFAVLLLI FSLGRHT  
RQMRNTVAGSRVPGGAPISALLSILSFLILYFSHCMIKVFLSSLKFH --- IRRFIFLFFILVIGIYP  
SGHSLILILGNPKLKQNAKKFLLHKKCCQ\*

>P1;4lde

structureX:4lde: 1: A: 314: : : : 0.00:0.00

-DEVVVVGMGIVMSLIVLAIIVFGNVLVITAI AKF --- ERLQTVTNYFITSLACADLV MGLAVV PFGAAH  
ILTKTWTFGNFWCEFWTSIDVLCVTASIE TL CVIAVD RYFAIT --- SPF-KYQSL LTKNKARVI ILMVW  
IVSGLTSFLPIQMHWYRATHQEAINCYAEETCCDFFTNQAYAI-ASSIVSFYVPLVIMVFVYSRVFQEA  
KRQLQKID-----KFALKEHKALKTLGIIMGTFTLCWLPFFIVNIVHVIQDNLIRKEVYILLNWIGY  
VNSGFNPLIYCR-SPDFRIAFQELLCL-\*

>P1;tas2r4

sequence:sp\_Q9NYW5\_T2R4\_HUMAN\_Tas/1-299: 1: : 299: : : : 0.00: 0.00

-----MLRLFYFSAI IASVILNFVGIIMNLFITV V NCKT WVKSHRISSDRILFSLGITRFLMLGLFLV  
NTIYFVSSNTE-RSVYLSAFFVLCFMFLDSSSVWFV TLLN ILYCVKITNFQHSVFL LKRNISP KIPRL  
LLACVLI SAFTTCLYITLSQASFPF-ELV TTRNNTSFNISEGILSLVVS LVLSSSLQFI INVT SASLLI  
HSLRRHIQKMQKNATGFWN PQTEAHV GAMKLMVYFLILYIPYSVATLVQYLPFYAGMDMGTKSICLIFA  
TLYSPGHSVLII I ITHPKLKTAKKILCFKK\*

>P1;4lde\_A

structureX:4lde: 1: A: 314: : : : 0.00:0.00

TWDAYAADEVVVVGMGIVMSLIVLAIIVFGNVLVITAI AKF --- FERLQTVTNYFITSLACADLV MGLAVV  
PFGAAHILTKTWTFGNFWCEFWTSIDVLCVTASIE TL CVIAVD RYFAIT --- SPFKYQSL LTKNKARVI  
ILMVWIVSGLTSFLPIQMHWYRATHQEAINCYAEETCCDFFTNQAYAIASSIVSFYVPLVIMVFVYSRV  
FQEA KRQLQK-----FALKEHKALKTLGIIMGTFTLCWLPFFIVNIVHVIQDN-LIRKEVYILLNWIG  
YVNSGFNPLIYC-RSPDFRIAFQELLCL--\*

>P1;tas2r10

sequence:tas2r10: : : : : 0.00: 0.00

MLRVVEGIFIFVVVSESVFVGLNGFVGLVNCIDCAKN-KLSTIGFILTGLAISRI FLIWI IITDGF IQ  
IFSPNYASGNLIEYISYFWVIGNQSSMWFATSLSIFYFLKIANFSNYIFLWLKSR TNMVL PFMIVFLLI  
SSLLNFYIAKILNDYK-TKNDTVWDLNMYKSEYFIKQILLNLGVIFFF T LSLITCIFLI I SLWRHNRQM  
QSNVTGLRDSNTEAHVKAMKVLISFII LFILYFIGMAIEISCF TVRENKLLLMFGMTT TAIYPWGH SFI  
LILGNSK LKQASLRVLQQLKC\*

>P1;4lde

structureX:4lde: 1: A: 314: : : : 0.00:0.00

-DEVVVVGMGIVMSLIVLAIIVFGNVLVITAI AKF --- FERLQTVTNYFITSLACADLV MGLAVV PFGAAH  
ILTTWTFGNFWCEFWTSIDVLCVTASIE TL CVIAVD RYFAIT SPFKYQSL LTKNKARVI ILMVWIVSGL  
TSFLQMHWYRATHQEAINCYAEETCCDFFTNQAYAIASSIVSFYVPLVIMVFVYSRVFQEA KRQLQ ---  
K ---AKEHKALKTLGIIMGTFTLCWLPFFIVNIVHVIQDN-LIRKEVYILLNWIGYVNSGFNPLIYCR-R  
SPDFRIAFQELLCL-----\*

**>P1;tas2r16**

sequence:sp\_Q9NYV7\_T2R16\_HUMAN\_Tas/1-291: 1: : 291: :: : 0.00: 0.00

MIPIQLTVFFMIIVVLESITIIVQSSLIVAVLGREWLQVRRMLPVDMLISLIGISRFLQWASMLNNFC  
SYFNLN-----YVLCNLTITWEFFNILTFWLNLSLLTVFYCIKVSSFTHHIFLWLRWRILRFPWILLGSL  
MITCVTIIPSAIGNYIQIQLLTMEHLPRNSTVTDKLENFHQYQFQAHTVALVIPFILFLASTIFLMASL  
TKQIQHH---STGHCNPSMKARFTALRSLAVLFIVFTSYFLTILITIIIGTLFDKRCWLWVWEAFVYAFI  
LMHSTSLMLSSPTLKRIKGGC\*

**>P1;4Ide**

structureX:4Ide: 1: A: 314: :: : 0.00:0.00

--DEVVVVGMGIVMSLIVLAIIVFGNVLVITAIK---FERLQTVTNFYFITSLACADLMGLAVVPFGAAH  
ILTKTWTFGNFWCFWTSIDVLCVTASIEITLCVIAVDYFAITSPFKYQSLLTKNKARVIIIMVWIVSG  
LTSFLPIQMHWYRATHQEA-----INCYAEETCCDFFTNQAYAIASSIVSFYVPLVIMVFVYSRVFQEA  
RQLQK-----FALKEHKALKTLGIIMGTFTLCWLPFFIVNIVHVIQDNLIRKEVYILLNWIGYVNSGF  
NPLIYC-RSPDFRIAFQELL\*

**>P1;tas2r30**

sequence:sp\_P59541\_T2R30\_HUMAN\_Tas/1-319: 1: : 319: :: : 0.00: 0.00

LPIIFSIILIVVIVFVIGNFANGFIALVNSIEWVKRQKISFVDQILTALAVSRVGLLWVLLHWHYATQLNP  
AF-YSVEVRITAYNVWAVTNHFSSWLATSLSMFYLLRIANFNSNLIIFLRKRRVKS SVLVILLGPLLFLV  
CHLFVINMDET VWTKE--YEGNVTWKIKLRSAMYHSNMTLTMLANFVPLTTLTISFLLLICSLCKHLKK  
MQLHGKGSQDPSTKVHIKALQTVTSFLLLCAIYFLSMIISVCNFGRLKQPVFMFCQAIIFSYSPSTHPF  
ILILGNKCLKQIFLSVLRH\*

**>P1;4Ide**

structureX:4Ide: 1: A: 314: :: : 0.00:0.00

WVVGMGIVMSLIVLAIIVFGNVLVITAIK---FERLQTVTNFYFITSLACADLMGLAVVPFGAAHILTK  
TWTFGNFWCFWTSIDVLCVTASIEITLCVIAVDYFAIT---SPFKYQSLLTKNKARVIIIMVWIVSGL  
TSFLPIQMHWYRATHQEA INCYAEETCCDFFTNQAYAIASSIVSFYVPLVIMVFVYSRVFQEAQRQLQK  
-----FALKEHKALKTLGIIMGTFTLCWLPFFIVNIVHVIQDN-LIRKEVYILLNWIGYVNSGFNPLI  
YC-RSPDFRIAFQELLCL\*

**>P1;tas2r31**

sequence:tas2r31: :: :: : 0.00: 0.00

TTFIPIIFSSVVVLFVIGNFANGFIALVNSIERVKRQKISFADQILTALAVSRVGLLWVLLLNWYSTV  
FN--PAFY SVEVRTTAYNVWAVTGHFNSWLATSLSIFYLLKIANFNSNLIIFLHLKRRVKS SVILVMLLGPL  
LFLACQ---LFVINMKEIVRTKEYEGNLTWKIKLRSVAVY--LSDATVTTLGNLVPFTLTLCLLCLLCSL  
CKHLKMKQLHGKGSQDPSTKVHIKALQTVIFFLL-LCAVYFLSIMISVWSFGSLE--NKPVFMFCKAIR  
FSYPSIHFFILIWGNKCLKQTFLSVLRQVRYVWK\*

**>P1;4Ide**

structureX:4Ide: 1: A: 314: :: : 0.00:0.00

-DEVVVVGMGIVMSLIVLAIIVFGNVLVITAIK---FERLQTVTNFYFITSLACADLMGLAVVPFGAAH  
ILTKTWTFGNFWCFWTS-IDVLCVTASIEITLCVIAVDYFAITSPF-KYQSLLTKNKARV--IILMV--  
-WIVSGLTSFLPIQMHWYRATHQEA INCYAEETCCDFFTNQAYAIASSIVSFYVPLVIMVFVYSRVFQEA  
AKRQLQKIDK-----FALKEHKALKTLGIIMGTFTLCWLPFFIVNIVHVIQDNLIRKEVYILLNWIG  
YVNSGFNPLIYCR-SPDFRIAFQELLCLRSSL\*

**>P1;tas2r38**

sequence:sp\_P59533\_T2R38\_HUMAN\_Tas/1-333: 1: : 333: :: : 0.00: 0.00

MLTLTRIRTVSYEVRSTFLFISVLEFAVGFLTNAFVFLVNFWDVVKRQALSNSDCVLLCLLSISRLFLHG  
LLFLSAIQLTHTFQKLSEPLNHSYQAIIMLWMIANQANLWLAACLSLLYCSKLIRFSHTFLICLASWVSR  
KISQMLLGIILCSCICTVLCVWCFFSRPHFTVTTVLFMNNTRLNWQIKDLNLFYSFLFCYLWSVPPFL  
LFLVSSGMLTVSLGRHMRTMKVYTRNSRDPSLEAHIKALKSLVSFFCFVVISSCAAFISVPLLIILWRDK  
IGVMVCVGIMAACPSGHAAILISGNAKLRRRAVMTILLWAQSSLK\*

>P1;4Ide

structureX:4Ide: 1: A: 314: :: :0.00:0.00

---TWDAYAADEVVWVGMGIVMSLIVLAIIVFGNVLVITAIK---FERLQTVTNYFITSLACADLVMGLA  
VVPFGAAHILTKTWT-FGNWFCEFWTSIDVLCVTASIE TLCVIAVD RYFAIT---SPFKYQSLLTKNKA  
RVIIILMVWIVSGLTSFLPIQMHWRATHQ-----EAINCYAEETCCDFFTNQAYAIASSIVSFYVPLVIM  
VFVYSRVFQEAKRQLQKFA-----LKEHKALKTLGIIMGTFTLCWLPFFIVNIVHVIQDN-LIRKEVY  
ILLNWIGYVNSGFNPLIYC-RSPDFRIAFQELLCL-----\*

>P1;tas2r43

sequence:: 1: : 302: :: :0.00: 0.00

MITFLPIIFSSLVVTVFVIGNFANGFIALVNSIEWFKRQKISFADQILTALAVSRVGLLWVLLLNWYST  
VLNPAF-NSVEVRTTAYNIWAVINHFSNWLATTLISIFYLLKIANFNSNFI FLHLKRRVKSVILVMLLGPL  
LFLACHLFVINMNEIVRTKE--FEGNMTWKIKLKSAMYFSNMTVTMVANLVPFTLTLLSFMLLICSLCK  
HLKKMQLHGKGSQDPSTKVHIKALQTVISFLLLCAIYFLSIMISVWSFGSLENKPVFMFCKAIRFSYPS  
IHPFILIWGNKCLKQTFLSVFWQ\*

>P1;4Ide

structureX:4Ide: 1: A: 314: :: :0.00:0.00

ADEVVWVGMGIVMSLIVLAIIVFGNVLVITAIK---FERLQTVTNYFITSLACADLVMGLAVVPFGAAH  
ILTKTWTFGNWFCEFWTSIDVLCVTASIE TLCVIAVD RYFAIT---SPFKYQSLLTKNKARVIIILMVWI  
VSGLTSFLPIQMHWRATHQEA INCYAEETCCDFFTNQAYAIASSIVSFYVPLVIMVFVYSRVFQEAKR  
QLQK-----FALKEHKALKTLGIIMGTFTLCWLPFFIVNIVHVIQDN-LIRKEVYILLNWIGYVNSGF  
NPLIYC-RSPDFRIAFQELLCL\*

>P1;tas2r46

sequence:tas2r46: :: :: :: :0.00: 0.00

MITFLPIIFSSILIVVTVFVIGNFANGFIALVNSIEWFKRQKISFADQILTALAVSRVGLLWVLLLNWYAT  
ELNPAF-NSIEVRITAYNVWAVINHFSNWLATSLISIFYLLKIANFNSNLI FLHLKRRVKSVVLVILLGPL  
LFLVCHLFVINMNOI IWTKE--YEGNMTWKIKLRSAMYLSTTTVTILANLVPFTLTLLISFLLLICSLCK  
HLKKMQLHGKGSQDPMSKVKHIKALQTVTSFLLLCAIYFLSIIMS VWSFESLENKPVFMFCEAIAFSYPS  
THPFILIWGNKCLKQTFLSVLWHVRYWVK\*

>P1;4Ide

structureX:4Ide: 1: A: 314: :: :0.00:0.00

ADEVVWVGMGIVMSLIVLAIIVFGNVLVITAIK---FERLQTVTNYFITSLACADLVMGLAVVPFGAAH  
ILTKTWTFGNWFCEFWTSIDVLCVTASIE TLCVIAVD RYFAIT---SPFKYQSLLTKNKARVIIILMVWI  
VSGLTSFLPIQMHWRATHQEA INCYAEETCCDFFTNQAYAIASSIVSFYVPLVIMVFVYSRVFQEAKR  
QLQKIDK----FALKEHKALKTLGIIMGTFTLCWLPFFIVNIVHVIQDN-LIRKEVYILLNWIGYVNSGF  
NPLIYC-RSPDFRIAFQELLCLRRSSLK\*

>P1;or1a1

sequence:Q9P1Q5: :: :: :: :0.00: 0.00

QQEQEDFFYILFLFIYPITLIGNLLIVLAIICSDVRLHNP MYFLLANLSLVDIFFSSVTIPKMLANHLLG  
SKSISFGGCLTQMYFMIALGNTDSYILAAMAYDRAVAISRPLHYTTIMSPRSCIWLIAGSWVIGNANAL  
PHTLLTASLSFCGNQEVANFYCDITP-LLKLSCSDIH FHVKMMYLGVGIFSVPLLCIIVSYIRVFSTVF  
QV-----PSTKGVLKAFSTCGSHLTVVSLYGTVMGT YFRPLTNY---SLKDAVITVMYTAVTPMLNPF I  
YSLRNRDMKAALRKL FNKRIS\*

>P1;4Ide

structureX:4Ide: 1: A: 314: :: :0.00:0.00

DEVVWVGMGIVMSLIVLAIIVFGNVLVITAIKFERLQTVTNYFITSLACADLVMGLAVVPFGAAHILTK  
TWTFGNWFCEFWTSIDVLCVTASIE TLCVIAVD RYFAITSPFKYQSLLTKNKARVIIILMVWIVSGLTSF  
LPIQMHWRAT---HQEA INC---YAEETCCDFFTNQAYAIASSIVSFYVPLVIMVFVYSRVFQEAKR  
QLQ---KFALKEHKALKTLGIIMGTFTLCWLPFFIVNIVHVIQDNLIRKEVYILLNWIGYVNSGFNPLI  
YCR-SPDFRIAFQELLCL---\*

**>P1;or2ag1**

sequence:OR2AG1: : : : : 0.00: 0.00

DSGSPELLCATITILYLLALISNGLLLLAITME---ARLHMPMYLLLGQLSLMDLLFTSVVTPKALADF  
LRRENTISFGGCALQMFLALTMGGAEDLLAFMAYDRYVAICHPLTYMTLMSSRACWLMVATSWILASL  
SALIYTVYTMHYFPCRAQEIRHLLCEIPHLLKVACADTSRYELMVYVMGVTFILPSLAAILASYTQILL  
TVLHM-PSNEGRKKALVTCSSHLTVVGMFYGAATFMYVLPSSFSH----TRQDNIISVFYTIIVTPALNPL  
IYSLRNKEVMRALRRVLGKYMLPAH---\*

**>P1;4Ide**

structureX:4Ide: 1: A: 314: : : : 0.00:0.00

DEVVVVGMGIVMSLIVLAIIVFGNVLVITAIK---FERLQTVTNYFITSLACADLMGLAVVPPFGAAHI  
LTKTWTFGNFWCFWTSIDVLCVTASIEITLCVIAVDYFAITSPFKYQSLLTKNKARVILMVWIVSGL  
TSFLPIQMHWYRAT-H-QEAIN--CYAET----CCDFFTNQAYAIASSIVSFYVPLVIMVFVYSRVFQE  
AKRQLQKFALKEHKALKTLGIIMGTFTLCWLPFFIVNIVHVIQDNLIR-KEYVILLNWIGYVNSGFNPL  
IYCR-SPDFRIAFQELLCL-----\*

**>P1;or2m3**

sequence:Q8NG83.1\_31-342\_Olfactory/1-312: 11: : 307: : : 0.00: 0.00

DFILLGIFNHSPHTTFLFFLVLAIFSVAFMGNSVMVLLIYLDLQHTPMYLLLSQLSLMDLMLICTTVP  
KMAFNYSLSGSKSISMAGCATQIFFYTSLLGSECFLLAVMAYDRYTAICHPLRYTNLMSPKICGLMTAFS  
WILGSTDGIIDVVATFSFSY-----CGSREIAHFFCDFPSLLILSCSDTSIFEKILFICCIIVMIVFPVA  
IIIASYARVILAVIHM--GSGEGRRAFTTCSHLLVVGMYGAALFMYIRPTSDRS--PTQDKMVSVF  
YTILTPMLNPLIYSLRNKEVTRAFMKILGK\*

**>P1;4Ide**

structureX:4Ide: 1: A: 314: : : : 0.00:0.00

TGTWDAYAADEVVVVGMGIVMSLIVLAIIVFGNVLVITAIKFERLQTVTNYFITSLACADLMGLAVVPP  
FGAAHILTKTWTFGNFWCFWTSIDVLCVTASIEITLCVIAVDYFAITSPFKYQSLLTKNKARVILMV  
WIVSGLTSFLPIQMHWYRATHQEAINCYAET----C-----C-DFFTNQAYAIASSIVSFYVPLVI  
MVVFVYSRVFQEAQRQLQK-FALKEHKALKTLGIIMGTFTLCWLPFFIVNIVHVIQDNLIRKEYVILLNW  
IGYVNSGFNPLIYCR-SPDFRIAFQELLCL\*

**>P1;or7d4**

sequence:Q8NG98.1\_31-342\_Olfactory/1-312: 1: : 286: : : 0.00: 0.00

ELQPVLFGFLFLSMYLVTVLGNLLIILAVSSDHLHTPMYFFLSNLSFVDICFISTTVPKMLVSIQARSK  
DISYMGCLTQVYFLMMFAGMDTFLAVMAYDRYVAICHPLHYTVIMNPCLCGLLVLASWFIIFWFSLVH  
ILLMKRLTFSTGTEIPHFFCEPAQVLKVACSNLNNIVLYVATALLGVFPVAGILFSYSQIVSSLMGM  
---SSTKGKYKAFSTCGSHLCVVSIFYGTGLGVYLSSAVTHS--SQSSSTASVMYAMVTPMLNPFYISLR  
NKDVKGALERLLSR\*

**>P1;4Ide**

structureX:4Ide: 1: A: 314: : : : 0.00:0.00

VVVVGMGIVMSLIVLAIIVFGNVLVITAIKFERLQTVTNYFITSLACADLMGLAVVPPFGAAHILTKTW  
TFGNFWCFWTSIDVLCVTASIEITLCVIAVDYFAITSPFKYQSLLTKNKARVILMVWIVSGLTSFLP  
IQMHWYR---ATHQEAINCYAETCC----DFFTNQAYAIASSIVSFYVPLVIMVFVYSRVFQEAQRQL  
QK-FALKEHKALKTLGIIMGTFTLCWLPFFIVNIVHVIQDNLIRKEYVILLNWIGYVNSGFNPLIYCR-  
SPDFRIAFQELLCL\*

## Section 2: Quality of the docking results.

### Section 2.1: EC<sub>50</sub> values interpretation

In principle, mutations affecting agonist binding should affect EC<sub>50</sub> concentration values, while those affecting activation could affect the overall amplitude of the dose-response curve (Colquhoun, 1998; Strange, 2008). However, any mutation may simultaneously shift the relative population of the spectrum of receptor conformations relative to the wild-type receptor (Changeux and Edelstein, 2011). This leads to conformation-dependent effects, rather than agonist-based effects (Kenakin, 2002). In addition, effects indirectly related to the ligand affinity of the receptor are also possible, such as shaping of the binding cavity (Marchiori et al., 2013; Sandal et al., 2015) and second-shell effects (i.e. residues important to maintain the actual binding residue(s) in the right conformation to interact with the ligand) (Singh et al., 2011, Geithe et al., 2017). As a result, EC<sub>50</sub> measurements cannot be simply interpreted in terms of binding affinity or activation (Colquhoun, 1998; Strange, 2008; Williams and Hill, 2009; Strange, 2010).

### Section 2.2: Statistical analysis of the docking results.

**Supplementary Table 1.** Analysis of the docking data of the hChem-GPCR/agonist complexes predicted by Haddock (Dominguez et al., 2003), Autodock Vina (Trott and Olson, 2010) and Glide (Friesner et al., 2004). In the first column all the hChemGPCR/agonist pairs for which experimental data are available are indicated; the charge of the ligand is shown in parentheses. The second column shows the residues for which mutagenesis data are available. Residues belonging to the bottom half of the receptor, to the N- or C-termini, and to the TM8 have been omitted, as they are well outside the canonical orthosteric binding site of class A GPCRs (Venkatakrisnan et al., 2013) and thus they are expected not to be involved in ligand binding. In the third column, residues are numbered accordingly to the GPCRdb numbering scheme (Isberg et al., 2015) of our template, the  $\beta$ 2 adrenoceptor (PDB code: 4LDE). In the fourth column, interpretation of EC<sub>50</sub> values for the corresponding residues is reported using the following nomenclature: c = change in EC<sub>50</sub>; nc = no significant change in EC<sub>50</sub>. In the following columns, for each docking program it is indicated whether the residue is within the 5.5 Å cut-off distance from the ligand (Y=yes; N=no) and the prediction outcome for this residue (TP=true positive, TN=true negative, FP=false positive, FN=false negative, see Figure 3 in the main text), depending on the presence or absence of an actual chemical interaction. For each hChemGPCR/agonist complex, the resulting recall and precision values are shown in the last row (in red for HADDOCK, green for AutoDock Vina and blue for Glide).



|                                                   | Experimental data |      |                  | HADDOCK                         |       | AutoDock Vina                   |       | Glide                           |       |
|---------------------------------------------------|-------------------|------|------------------|---------------------------------|-------|---------------------------------|-------|---------------------------------|-------|
| hChem-GPCR/<br>agonist complex<br>(ligand charge) | Res.              | Pos. | EC <sub>50</sub> | Dist.                           | Pred. | Dist.                           | Pred. | Dist.                           | Pred. |
| hTAS2R1/<br>dextromethorphan<br>(+1)              | N66               | 2.62 | c                | Y                               | TP    | Y                               | TP    | Y                               | TP    |
|                                                   | E74               | ECL1 | c                | Y                               | TP    | Y                               | FP    | N                               | FN    |
|                                                   | N89               | 3.36 | c                | N                               | FN    | Y                               | FP    | N                               | FN    |
|                                                   |                   |      |                  | Recall: 0.67<br>Precision: 1.00 |       | Recall: 1.00<br>Precision: 0.33 |       | Recall: 0.00<br>Precision: 0.00 |       |
| hTAS2R4/<br>quinine<br>(+1)                       | A90               | 3.26 | c                | N                               | FN    | N                               | FN    | N                               | FN    |
|                                                   | F91               | 3.27 | nc               | N                               | TN    | N                               | TN    | N                               | TN    |
|                                                   | F92               | 3.28 | nc               | Y                               | FP    | Y                               | FP    | Y                               | FP    |
|                                                   | Y155              | 4.61 | c                | N                               | FN    | N                               | FP    | N                               | FN    |
|                                                   | N173              | ECL2 | c                | N                               | FN    | N                               | FN    | N                               | FN    |
|                                                   | T174              | ECL2 | c                | N                               | FN    | N                               | FN    | N                               | FN    |
|                                                   | Y258              | 6.59 | c                | N                               | FN    | N                               | FN    | N                               | FN    |
|                                                   | K270              | 7.35 | c                | Y                               | TP    | Y                               | TP    | Y                               | TP    |
|                                                   |                   |      |                  | Recall: 0.17<br>Precision: 0.50 |       | Recall: 0.17<br>Precision: 0.50 |       | Recall: 0.17<br>Precision: 0.50 |       |
| hTAS2R10/<br>denatonium<br>(+1)                   | S85               | 3.29 | nc               | N                               | TN    | Y                               | FP    | Y                               | FP    |
|                                                   | W88               | 3.32 | nc               | Y                               | FP    | Y                               | FP    | Y                               | FP    |
|                                                   | V89               | 3.33 | c                | Y                               | TP    | Y                               | TP    | N                               | FN    |
|                                                   | N92               | 3.36 | nc               | Y                               | FP    | N                               | TN    | N                               | TN    |
|                                                   | Q93               | 3.37 | nc               | Y                               | FP    | N                               | TN    | N                               | TN    |
|                                                   | Q175              | 5.43 | c                | N                               | FN    | N                               | FN    | N                               | FN    |
|                                                   | L178              | 5.46 | c                | N                               | FN    | N                               | FN    | N                               | FN    |
|                                                   | Y239              | 6.56 | nc               | Y                               | FP    | N                               | TN    | N                               | TN    |
|                                                   | M263              | 7.44 | nc               | Y                               | FP    | Y                               | FP    | Y                               | TP    |
|                                                   | T266              | 7.47 | c                | N                               | FN    | N                               | FN    | N                               | FN    |
|                                                   |                   |      |                  | Recall: 0.25<br>Precision: 0.17 |       | Recall: 0.25<br>Precision: 0.25 |       | Recall: 0.20<br>Precision: 0.33 |       |

|                                                     |      |      |    |                                 |                                 |                                 |                                 |                                 |                                 |
|-----------------------------------------------------|------|------|----|---------------------------------|---------------------------------|---------------------------------|---------------------------------|---------------------------------|---------------------------------|
| hTAS2R10/<br>parthenolide<br>(0)                    | S85  | 3.29 | c  | N                               | FN                              | Y                               | FP                              | Y                               | FP                              |
|                                                     | W88  | 3.32 | nc | Y                               | FP                              | Y                               | FP                              | Y                               | FP                              |
|                                                     | V89  | 3.33 | nc | Y                               | FP                              | N                               | TN                              | N                               | TN                              |
|                                                     | N92  | 3.36 | nc | Y                               | FP                              | N                               | TN                              | N                               | TN                              |
|                                                     | Q93  | 3.37 | nc | N                               | TN                              | N                               | TN                              | N                               | TN                              |
|                                                     | Q175 | 5.43 | nc | N                               | TN                              | N                               | TN                              | N                               | TN                              |
|                                                     | L178 | 5.46 | c  | Y                               | TP                              | N                               | FN                              | N                               | FN                              |
|                                                     | Y239 | 6.56 | nc | Y                               | FP                              | N                               | TN                              | Y                               | FP                              |
|                                                     | M263 | 7.44 | nc | N                               | TN                              | Y                               | FP                              | Y                               | FP                              |
|                                                     | T266 | 7.47 | nc | N                               | TN                              | N                               | TN                              | N                               | TN                              |
|                                                     |      |      |    |                                 | Recall: 0.50<br>Precision: 0.20 |                                 | Recall: 0.00<br>Precision: 0.00 |                                 | Recall: 0.00<br>Precision: 0.00 |
| hTAS2R10/<br>strychnine<br>(+1)                     | S85  | 3.29 | c  | Y                               | FP                              | Y                               | TP                              | Y                               | FP                              |
|                                                     | W88  | 3.32 | nc | Y                               | FP                              | Y                               | FP                              | Y                               | FP                              |
|                                                     | V89  | 3.33 | c  | Y                               | TP                              | Y                               | TP                              | Y                               | TP                              |
|                                                     | N92  | 3.36 | nc | Y                               | FP                              | Y                               | FP                              | N                               | TN                              |
|                                                     | Q93  | 3.37 | nc | Y                               | FP                              | N                               | TN                              | N                               | TN                              |
|                                                     | Q175 | 5.43 | c  | N                               | FN                              | N                               | FN                              | N                               | FN                              |
|                                                     | L178 | 5.46 | c  | Y                               | TP                              | N                               | FN                              | N                               | FN                              |
|                                                     | Y239 | 6.56 | nc | N                               | TN                              | Y                               | FP                              | Y                               | FP                              |
|                                                     | M263 | 7.44 | nc | Y                               | FP                              | Y                               | FP                              | Y                               | FP                              |
|                                                     | T266 | 7.47 | nc | N                               | TN                              | N                               | TN                              | N                               | TN                              |
|                                                     |      |      |    |                                 | Recall: 0.67<br>Precision: 0.29 |                                 | Recall: 0.40<br>Precision: 0.40 |                                 | Recall: 0.33<br>Precision: 0.20 |
| hTAS2R16/<br>arbutin<br>(0)                         | E86  | 3.33 | c  | Y                               | TP                              | Y                               | TP                              | Y                               | TP                              |
|                                                     | N89  | 3.36 | c  | N                               | FN                              | N                               | FN                              | N                               | FN                              |
|                                                     | F93  | 3.40 | c  | N                               | FN                              | N                               | FN                              | N                               | FN                              |
|                                                     | Q177 | 5.39 | nc | Y                               | FP                              | Y                               | FP                              | Y                               | FP                              |
|                                                     | H181 | 5.43 | c  | N                               | FN                              | N                               | FN                              | N                               | FN                              |
|                                                     | F240 | 6.52 | c  | N                               | FN                              | N                               | FN                              | N                               | FN                              |
|                                                     | I243 | 6.55 | c  | Y                               | FP                              | Y                               | TP                              | Y                               | TP                              |
|                                                     |      |      |    | Recall: 0.20<br>Precision: 0.33 |                                 | Recall: 0.33<br>Precision: 0.67 |                                 | Recall: 0.33<br>Precision: 0.67 |                                 |
| hTAS2R16/<br>phenyl-β-D-gluco-<br>pyranoside<br>(0) | E86  | 3.33 | c  | Y                               | TP                              | N                               | FN                              | Y                               | FP                              |
|                                                     | N89  | 3.36 | c  | N                               | FN                              | N                               | FN                              | N                               | FN                              |
|                                                     | F93  | 3.40 | c  | N                               | FN                              | N                               | FN                              | N                               | FN                              |

|                                         |      |      |    |                                 |    |                                 |    |                                 |    |
|-----------------------------------------|------|------|----|---------------------------------|----|---------------------------------|----|---------------------------------|----|
|                                         | Q177 | 5.39 | nc | Y                               | FP | Y                               | FP | Y                               | FP |
|                                         | H181 | 5.43 | c  | N                               | FN | N                               | FN | N                               | FN |
|                                         | F240 | 6.52 | c  | N                               | FN | N                               | FN | N                               | FP |
|                                         | I243 | 6.55 | c  | N                               | FN | Y                               | TP | Y                               | TP |
|                                         |      |      |    | Recall: 0.17<br>Precision: 0.25 |    | Recall: 0.17<br>Precision: 0.5  |    | Recall: 0.25<br>Precision: 0.25 |    |
| hTAS2R16/<br>salicin<br>(0)             | E86  | 3.33 | c  | Y                               | TP | Y                               | TP | N                               | FN |
|                                         | N89  | 3.36 | c  | N                               | FN | N                               | FN | N                               | FN |
|                                         | F93  | 3.40 | c  | N                               | FN | N                               | FN | N                               | FN |
|                                         | Q177 | 5.39 | nc | Y                               | FP | Y                               | FP | Y                               | FP |
|                                         | H181 | 5.43 | c  | N                               | FN | N                               | FN | N                               | FN |
|                                         | F240 | 6.52 | c  | N                               | FN | N                               | FN | N                               | FN |
|                                         | I243 | 6.55 | c  | Y                               | FP | Y                               | TP | Y                               | FP |
|                                         |      |      |    | Recall: 0.20<br>Precision: 0.33 |    | Recall: 0.33<br>Precision: 0.67 |    | Recall: 0.00<br>Precision: 0.00 |    |
| hTAS2R30/<br>denatonium<br>(+1)         | W88  | 3.32 | c  | Y                               | TP | N                               | FN | N                               | FN |
|                                         | N92  | 3.36 | c  | N                               | FN | N                               | FN | N                               | FN |
|                                         |      |      |    | Recall: 0.50<br>Precision: 1.00 |    | Recall: 0.00<br>Precision: 0.00 |    | Recall: 0.00<br>Precision: 0.00 |    |
| hTAS2R31/<br>aristolochic acid<br>(-1)  | K265 | 7.38 | c  | Y                               | TP | N                               | FN | N                               | FN |
|                                         | R268 | 7.41 | c  | Y                               | TP | N                               | FN | N                               | FN |
|                                         |      |      |    | Recall: 1.00<br>Precision: 0.50 |    | Recall: 0.00<br>Precision: 0.00 |    | Recall: 0.00<br>Precision: 0.00 |    |
| hTAS2R38/<br>phenylthiocarbamide<br>(0) | W99  | 3.32 | nc | Y                               | FP | N                               | TN | Y                               | FP |
|                                         | N103 | 3.36 | c  | N                               | FN | N                               | FN | N                               | FN |
|                                         | N179 | ECL2 | nc | N                               | TN | N                               | TN | N                               | TN |
|                                         | R181 | ECL2 | nc | N                               | TN | N                               | TN | N                               | TN |
|                                         | N183 | ECL2 | nc | N                               | TN | N                               | TN | N                               | TN |
|                                         | F197 | 5.42 | nc | N                               | TN | N                               | TN | N                               | TN |
|                                         | W201 | 5.46 | c  | N                               | FN | N                               | FN | N                               | FN |
|                                         | F255 | 6.47 | nc | N                               | TN | N                               | TN | N                               | TN |
|                                         | F264 | 6.56 | c  | N                               | FN | N                               | FN | N                               | FN |
|                                         |      |      |    | Recall: 0.00<br>Precision: 0.00 |    | Recall: 0.00<br>Precision: 0.00 |    | Recall: 0.00<br>Precision: 0.00 |    |
| hTAS2R38/<br>propylthiouracil<br>(0)    | W99  | 3.32 | nc | Y                               | FP | N                               | TN | Y                               | FP |
|                                         | M100 | 3.33 | nc | N                               | TN | N                               | TN | N                               | TN |
|                                         | N103 | 3.36 | c  | N                               | FN | N                               | FN | N                               | FN |

|                                               |      |      |    |   |                                 |                                 |                                 |   |    |
|-----------------------------------------------|------|------|----|---|---------------------------------|---------------------------------|---------------------------------|---|----|
|                                               | N179 | ECL2 | nc | N | TN                              | N                               | TN                              | N | TN |
|                                               | R181 | ECL2 | nc | N | TN                              | N                               | TN                              | N | TN |
|                                               | N183 | ECL2 | nc | N | TN                              | N                               | TN                              | N | TN |
|                                               | F197 | 5.42 | c  | N | FN                              | N                               | FN                              | N | FN |
|                                               | W201 | 5.46 | c  | N | FN                              | N                               | FN                              | N | FN |
|                                               | F264 | 6.56 | c  | N | FN                              | N                               | FN                              | N | FN |
|                                               |      |      |    |   | Recall: 0.00<br>Precision: 0.00 | Recall: 0.00<br>Precision: 0.00 | Recall: 0.00<br>Precision: 0.00 |   |    |
| <b>hTAS2R43/<br/>IMNB<br/>(0)</b>             | N76  | ECL1 | c  | N | FN                              | N                               | FN                              | N | FN |
|                                               | I87  | 3.31 | nc | N | TN                              | N                               | TN                              | N | TN |
|                                               | I91  | 3.35 | c  | N | FN                              | N                               | FN                              | N | FN |
|                                               | N92  | 3.36 | c  | N | FN                              | N                               | FN                              | N | FN |
|                                               |      |      |    |   | Recall: 0.00<br>Precision: 0.00 | Recall: 0.00<br>Precision: 0.00 | Recall: 0.00<br>Precision: 0.00 |   |    |
| <b>hTAS2R43/<br/>6-nitrosaccharin<br/>(0)</b> | N76  | ECL1 | nc | N | TN                              | N                               | TN                              | N | TN |
|                                               | I87  | 3.31 | nc | N | TN                              | N                               | TN                              | N | TN |
|                                               | W88  | 3.32 | c  | Y | FP                              | Y                               | FP                              | N | FN |
|                                               | I91  | 3.35 | nc | N | TN                              | N                               | TN                              | N | TN |
|                                               | N92  | 3.36 | c  | N | FN                              | N                               | FN                              | N | FN |
|                                               |      |      |    |   | Recall: 0.50<br>Precision: 1.00 | Recall: 0.00<br>Precision: 0.00 | Recall: 0.00<br>Precision: 0.00 |   |    |
| <b>hTAS2R46/<br/>strychnine<br/>(+1)</b>      | E70  | 2.65 | c  | N | FN                              | N                               | FN                              | N | FN |
|                                               | L71  | ECL1 | c  | N | FN                              | N                               | FN                              | N | FN |
|                                               | I82  | 3.26 | c  | N | FN                              | N                               | FN                              | N | FN |
|                                               | N92  | 3.36 | c  | Y | TP                              | N                               | FN                              | N | FN |
|                                               | N150 | ECL2 | nc | N | TN                              | N                               | TN                              | N | TN |
|                                               | N161 | ECL2 | nc | N | TN                              | Y                               | FP                              | Y | FP |
|                                               | N176 | 5.39 | c  | N | FN                              | N                               | FN                              | N | FN |
|                                               | Y241 | 6.51 | c  | Y | TP                              | N                               | FN                              | N | FN |
|                                               | E253 | ECL3 | c  | N | FN                              | N                               | FN                              | N | FN |
|                                               | F261 | 7.35 | c  | N | FN                              | Y                               | TP                              | Y | TP |
|                                               | E265 | 7.39 | c  | Y | FP                              | N                               | FN                              | N | FN |
|                                               | A268 | 7.42 | c  | Y | TP                              | N                               | FN                              | N | FN |
|                                               | F269 | 7.43 | c  | Y | FP                              | N                               | FN                              | N | FN |
|                                               |      |      |    |   | Recall: 0.33<br>Precision: 0.60 | Recall: 0.09<br>Precision: 0.50 | Recall: 0.09<br>Precision: 0.50 |   |    |

|                                        |      |      |    |   |                                         |                                         |                                         |   |    |
|----------------------------------------|------|------|----|---|-----------------------------------------|-----------------------------------------|-----------------------------------------|---|----|
| <b>hOR1A1/<br/>R-carvone<br/>(0)</b>   | A106 | 3.34 | c  | N | FN                                      | N                                       | FN                                      | N | FN |
|                                        | G108 | 3.36 | nc | N | TN                                      | N                                       | TN                                      | N | TN |
|                                        | N109 | 3.37 | c  | N | FN                                      | N                                       | FN                                      | N | FN |
|                                        | D111 | 3.39 | c  | N | FN                                      | N                                       | FN                                      | N | FN |
|                                        | G152 | 4.53 | nc | N | TN                                      | N                                       | TN                                      | N | TN |
|                                        | N155 | 4.56 | c  | N | FN                                      | N                                       | FN                                      | N | FN |
|                                        | I205 | 5.46 | nc | N | TN                                      | N                                       | TN                                      | N | TN |
|                                        | Y250 | 6.47 | c  | N | FN                                      | N                                       | FN                                      | N | FN |
|                                        | Y251 | 6.48 | c  | N | FN                                      | N                                       | FN                                      | N | FN |
|                                        | Y276 | 7.41 | c  | N | FN                                      | N                                       | FN                                      | N | FN |
|                                        | T277 | 7.42 | c  | N | FN                                      | N                                       | FN                                      | N | FN |
|                                        |      |      |    |   | <b>Recall: 0.00<br/>Precision: 0.00</b> | <b>Recall: 0.00<br/>Precision: 0.00</b> | <b>Recall: 0.00<br/>Precision: 0.00</b> |   |    |
| <b>hOR1A1/<br/>S-carvone<br/>(0)</b>   | A106 | 3.34 | nc | N | TN                                      | N                                       | TN                                      | N | TN |
|                                        | G108 | 3.36 | nc | N | TN                                      | N                                       | TN                                      | N | TN |
|                                        | N109 | 3.37 | c  | N | FN                                      | N                                       | FN                                      | N | FN |
|                                        | D111 | 3.39 | c  | N | FN                                      | N                                       | FN                                      | N | FN |
|                                        | G152 | 4.53 | nc | N | TN                                      | N                                       | TN                                      | N | TN |
|                                        | N155 | 4.56 | c  | N | FN                                      | N                                       | FN                                      | N | FN |
|                                        | I205 | 5.46 | nc | N | TN                                      | Y                                       | FP                                      | N | TN |
|                                        | Y250 | 6.47 | c  | N | FN                                      | N                                       | FN                                      | N | FN |
|                                        | Y251 | 6.48 | c  | N | FN                                      | Y                                       | TP                                      | N | FN |
|                                        | Y276 | 7.41 | c  | N | FN                                      | N                                       | FN                                      | N | FN |
|                                        | T277 | 7.42 | c  | N | FN                                      | Y                                       | TP                                      | N | FN |
|                                        |      |      |    |   | <b>Recall: 0.00<br/>Precision: 0.00</b> | <b>Recall: 0.29<br/>Precision: 0.67</b> | <b>Recall: 0.00<br/>Precision: 0.00</b> |   |    |
| <b>hOR1A1/<br/>citronellol<br/>(0)</b> | T99  | 3.27 | nc | N | TN                                      | N                                       | TN                                      | N | TN |
|                                        | G108 | 3.36 | c  | N | FP                                      | N                                       | FP                                      | N | FP |
|                                        | N109 | 3.37 | c  | N | FP                                      | N                                       | FP                                      | N | FP |
|                                        | T110 | 3.38 | c  | N | FN                                      | N                                       | FN                                      | N | FN |
|                                        | I205 | 5.46 | nc | N | TN                                      | N                                       | TN                                      | N | TN |

|                                                                 |      |      |    |                                               |                                               |                                               |    |   |    |
|-----------------------------------------------------------------|------|------|----|-----------------------------------------------|-----------------------------------------------|-----------------------------------------------|----|---|----|
|                                                                 | V254 | 6.51 | nc | N                                             | TN                                            | Y                                             | FN | N | TN |
|                                                                 | T277 | 7.42 | nc | N                                             | TN                                            | Y                                             | FN | N | TN |
|                                                                 |      |      |    | <b>Recall: 0.00</b><br><b>Precision: 0.00</b> | <b>Recall: 0.00</b><br><b>Precision: 0.00</b> | <b>Recall: 0.00</b><br><b>Precision: 0.00</b> |    |   |    |
| <b>hOR2AG1/<br/>amylbutyrate<br/>(0)</b>                        | A104 | 3.32 | c  | Y                                             | TP                                            | Y                                             | TP | Y | FP |
|                                                                 | V260 | 6.55 | c  | N                                             | FN                                            | Y                                             | TP | N | FN |
|                                                                 | S263 | 6.58 | c  | N                                             | FN                                            | N                                             | FN | N | FN |
|                                                                 | V264 | 6.59 | c  | N                                             | FN                                            | N                                             | FN | N | FN |
|                                                                 | T279 | 7.42 | c  | N                                             | FN                                            | N                                             | FN | Y | TP |
|                                                                 |      |      |    | <b>Recall: 0.20</b><br><b>Precision: 1.00</b> | <b>Recall: 0.40</b><br><b>Precision: 1.00</b> | <b>Recall: 0.25</b><br><b>Precision: 0.50</b> |    |   |    |
| <b>hOR2M3/<br/>3-mercapto-2-methyl-<br/>pentan-1-ol<br/>(0)</b> | V78  | 2.58 | c  | N                                             | FN                                            | N                                             | FN | N | FN |
|                                                                 | I198 | 5.38 | c  | N                                             | FN                                            | N                                             | FN | Y | TP |
|                                                                 | Y259 | 6.55 | c  | Y                                             | TP                                            | N                                             | FN | Y | TP |
|                                                                 | R266 | ECL3 | c  | N                                             | FN                                            | N                                             | FN | N | FN |
|                                                                 |      |      |    | <b>Recall: 0.25</b><br><b>Precision: 1.00</b> | <b>Recall: 0.00</b><br><b>Precision: 0.00</b> | <b>Recall: 0.50</b><br><b>Precision: 1.00</b> |    |   |    |
| <b>hOR7D4/<br/>androstadienone<br/>(0)</b>                      | S75  | 2.55 | c  | N                                             | FN                                            | N                                             | FN | N | FN |
|                                                                 | P79  | 2.59 | c  | N                                             | FN                                            | N                                             | FN | N | FN |
|                                                                 | S84  | 2.64 | c  | N                                             | FN                                            | N                                             | FN | N | FN |
|                                                                 | R88  | ECL1 | c  | N                                             | FN                                            | N                                             | FN | N | FN |
|                                                                 | L162 | 4.63 | c  | N                                             | FN                                            | N                                             | FN | N | FN |
|                                                                 | A279 | 7.42 | c  | Y                                             | TP                                            | Y                                             | TP | Y | TP |
|                                                                 |      |      |    | <b>Recall: 0.17</b><br><b>Precision: 1</b>    | <b>Recall: 0.17</b><br><b>Precision: 1.00</b> | <b>Recall: 0.17</b><br><b>Precision: 1.00</b> |    |   |    |
| <b>hOR7D4/<br/>androstenone<br/>(0)</b>                         | S75  | 2.55 | c  | N                                             | FN                                            | N                                             | FN | N | FN |
|                                                                 | P79  | 2.59 | c  | N                                             | FN                                            | N                                             | FN | N | FN |
|                                                                 | S84  | 2.64 | c  | N                                             | FN                                            | N                                             | FN | N | FN |
|                                                                 | R88  | ECL1 | c  | N                                             | FN                                            | N                                             | FN | N | FN |
|                                                                 | L162 | 4.63 | c  | N                                             | FN                                            | N                                             | FN | N | FN |
|                                                                 | A279 | 7.42 | c  | Y                                             | TP                                            | Y                                             | TP | Y | TP |
|                                                                 |      |      |    | <b>Recall: 0.17</b><br><b>Precision: 1.00</b> | <b>Recall: 0.17</b><br><b>Precision: 0.00</b> | <b>Recall: 0.17</b><br><b>Precision: 1.00</b> |    |   |    |

**Section 2.3: Analysis of the Haddock docking results.** Using HADDOCK (Dominguez et al., 2003), seven predictions show high precision (Figure 1A, red circles), though with either low recall (those for the hOR7D4 in complex with androstenone and androstadienone, hOR2AG1 in complex with amylobutyrate and hOR2M3 in complex with 3-mercapto-2-methylpentan-1-ol) or modest recall (hTAS2R1 in complex with dextromethorphan, hTAS2R30 in complex with denatonium, and hTAS2R43 in complex with 6-nitrosaccharin). One prediction shows top recall (but modest precision); this is the prediction for hTAS2R31 in complex with the aristolochic acid (Figure 1A, yellow circle). Six predictions (those for hTAS2R38 in complex with its agonists propylthiouracil and phenyltiocarbamide, hTAS2R43 with its agonist IMNB, and hOR1A1 in complex with its agonists citronellol, (*R*)- and (*S*)-carvone) turn out to feature both zero precision and zero recall (Figure 1A, dark blue circles). As many as eight predictions feature intermediate values for the two performance metrics (Figure 1A, cyan circles).

**Section 2.4: Analysis of Vina docking results.** Using Autodock Vina (Trott and Olson, 2010), the docking results can also be grouped in four different clusters (Figure 1B). Three predictions (those for the hOR7D4 in complex with androstenone and androstadienone, along with that for hOR2AG1 with amylobutyrate) show high precision, but low or modest recall (Figure 1B, red circles). One prediction shows top recall but modest precision, i.e. that for hTAS2R1 receptor in complex with dextromethorphan (Figure 1B, yellow circle). Seven predictions (those for hTAS2R10 in complex with parthenolide, hTAS2R31 in complex with aristolochic acid, hTAS2R38 in complex with its two agonists PTC and PROP, hTAS2R46 in complex with strychnine, and hOR1A1 in complex with its agonists citronellol and (*R*)-carvone) turn out to feature both zero precision and zero recall (Figure 1B, dark blue circles). Finally eleven predictions, both for human bitter taste and olfactory receptors, present intermediate values for the two performance metrics (Figure 1B, cyan circles).

**Section 2.5: Analysis of Glide docking results.** Using Glide (Friesner et al., 2004), two predictions (for hOR7D4 in complex with its agonists androstenone and androstadienone) show high precision, but low recall (Figure 1C, red circles), similar to HADDOCK and AutoDock Vina predictions. Eleven predictions turn out to have zero precision and zero recall scores (Figure 1C, dark blue circles), while nine predictions (those for hTASR10 in complex with either denatonium or strychnine, hTAS2R16 in complex with arbutin or phenyl- $\beta$ -D-glucopyranoside, and the complexes hTAS2R46/strychnine and hOR2AG1/amylobutyrate) have medium values of both performance parameters (Figure 1C, cyan circles).

## Section 3: Structural analysis of the docking results

**Section 3.1: Protein/ligand interactions predicted for each of the docking programs.** The hChem-GPCR/agonist complexes are indicated in the same order as in Supplementary Table 1. All the images were generated with LigPlot<sup>+</sup> (Laskowski and Swindells, 2011), using a distance cut-off of 5.5 Å (i.e. the same threshold as in Supplementary Table 1). Chemical interactions are represented as dashed lines (hydrogen bonds and salt bridges) or spoked arcs (hydrophobic, stacking and electrostatic interactions). Note that the definition of the prediction outcome (TP, FP, TN or FN, see Figure 2 in the main text) includes both the distance threshold and the presence (or absence) of an actual chemical interaction. Therefore, Supplementary Figures 2-4 (see below) include TPs and FPs (highlighted with green and red boxes, respectively) and other predicted interacting residues for which experimental data are not yet available (and thus cannot be categorized using the binary classifier).



**Supplementary Figure 2.** 2D representation of the agonist binding cavity predicted by Haddock (Dominguez et al., 2003).

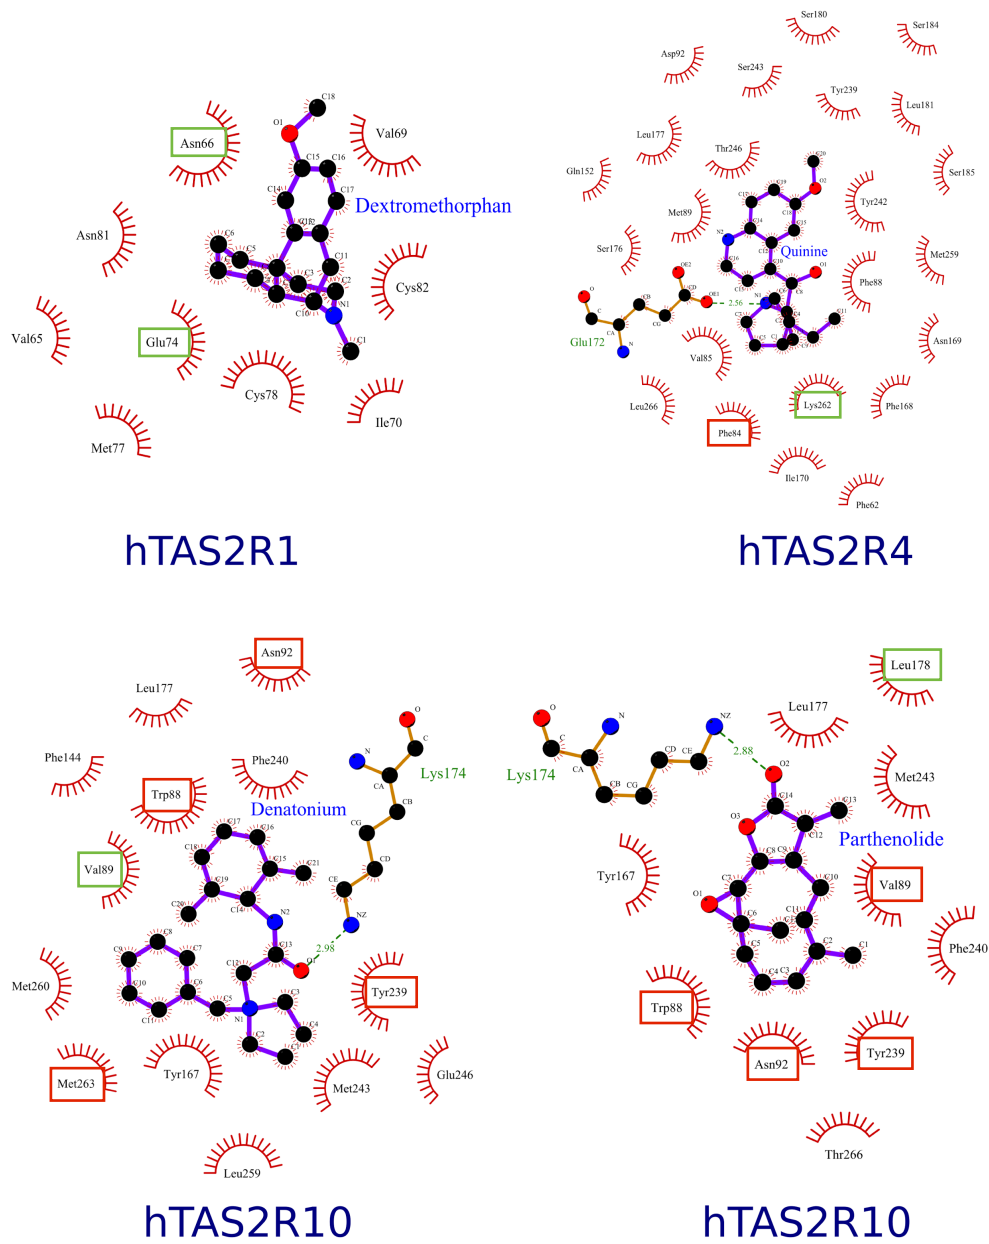

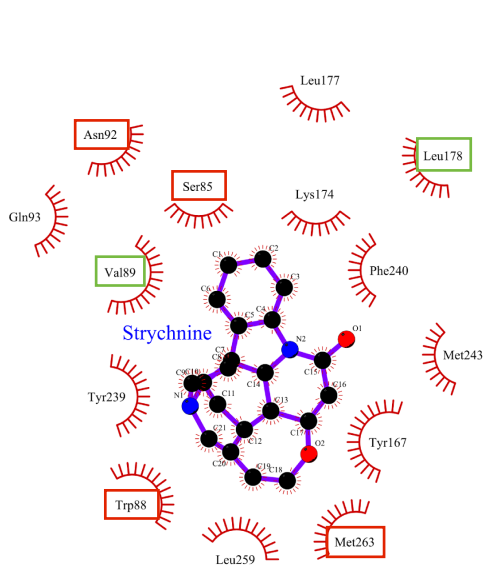

hTAS2R10

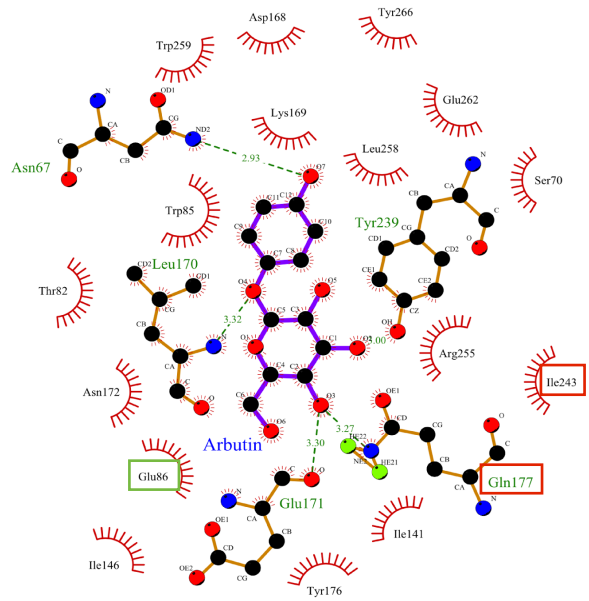

hTAS2R16

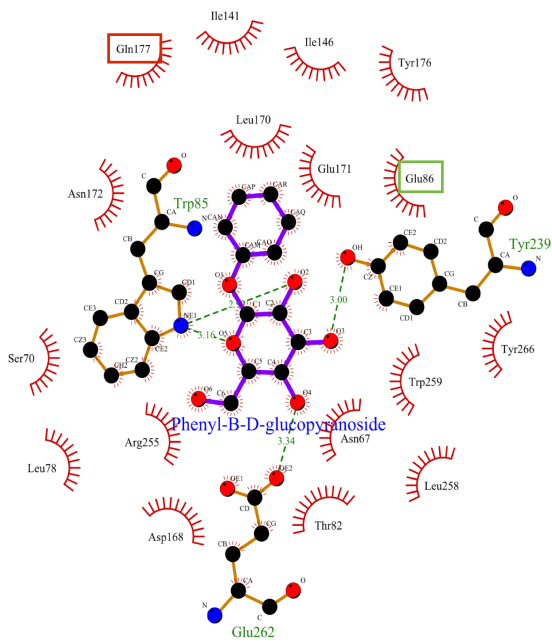

hTAS2R16

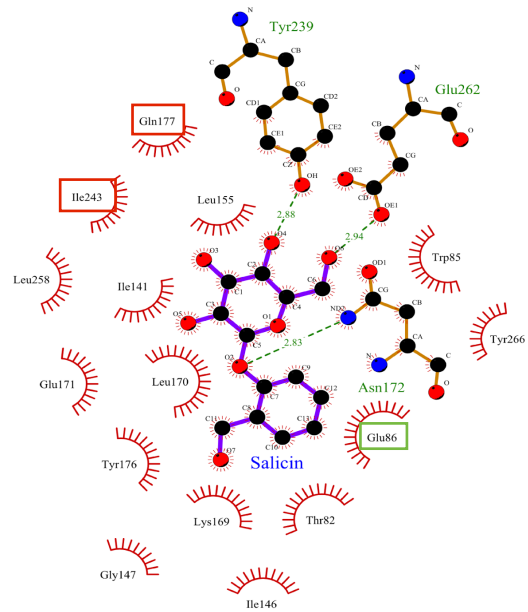

hTAS2R16

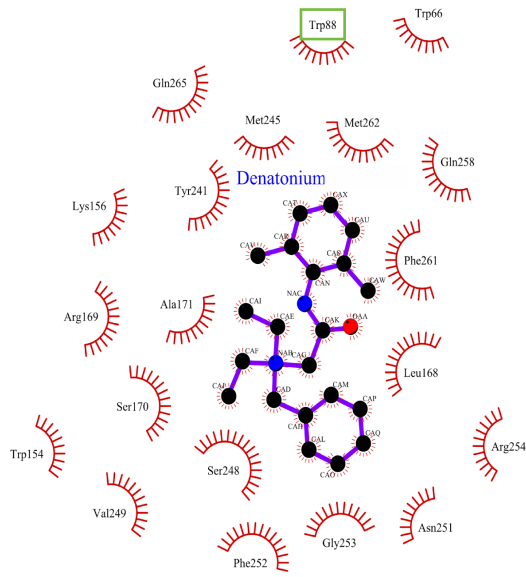

hTAS2R30

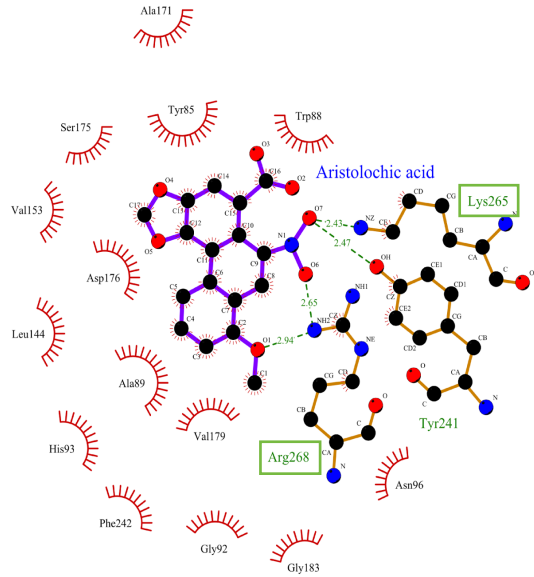

hTAS2R31

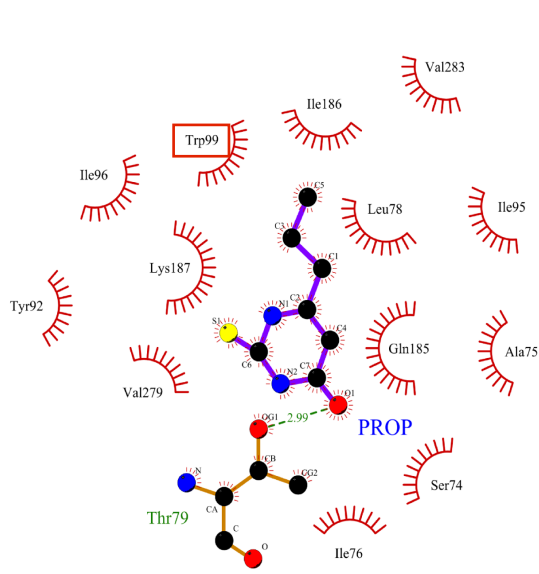

hTAS2R38

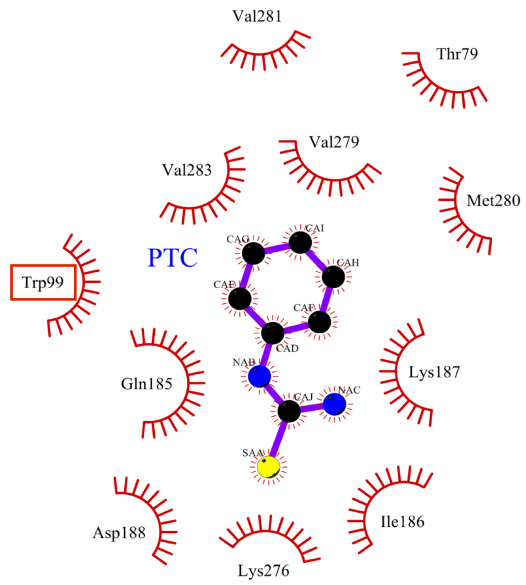

hTAS2R38

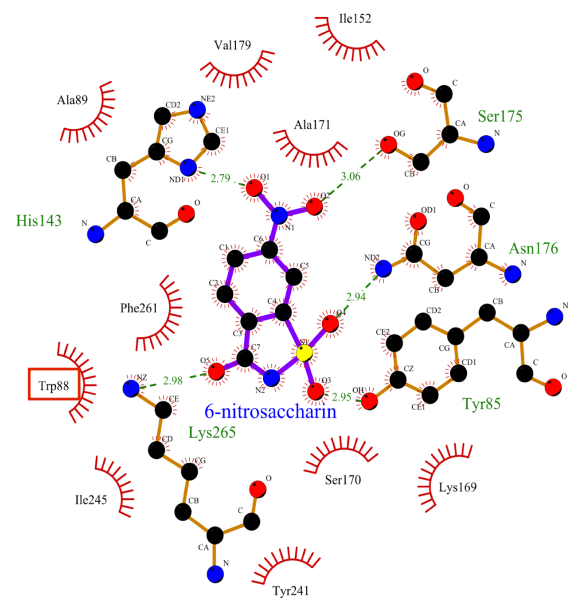

hTAS2R43

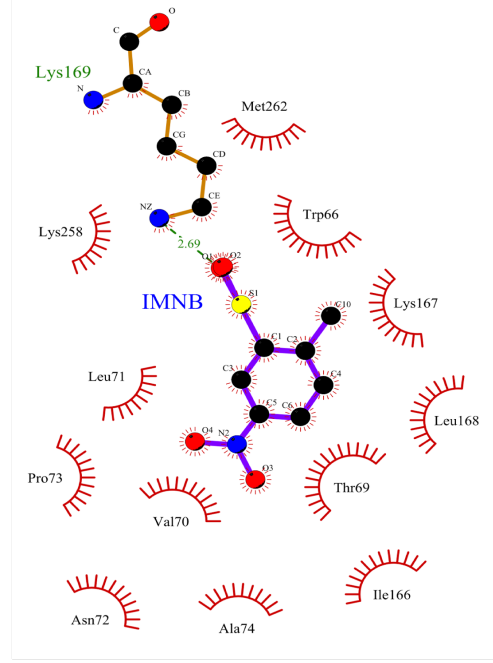

hTAS2R43

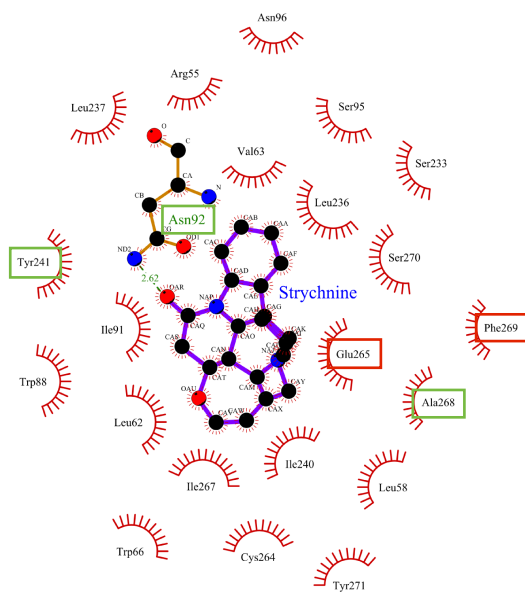

hTAS2R46

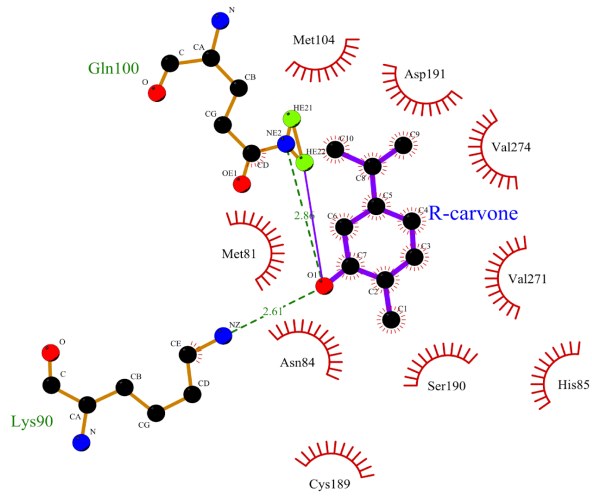

**hOR1A1**

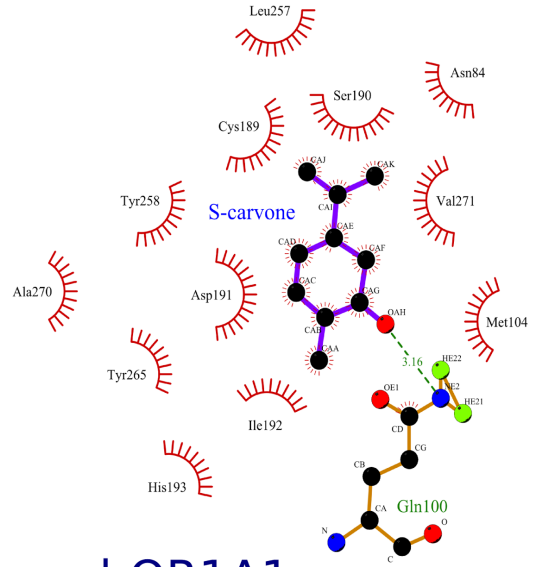

**hOR1A1**

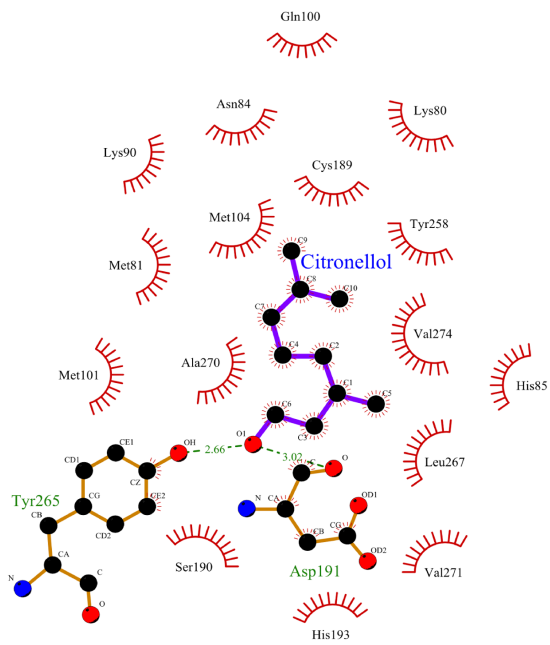

**hOR1A1**

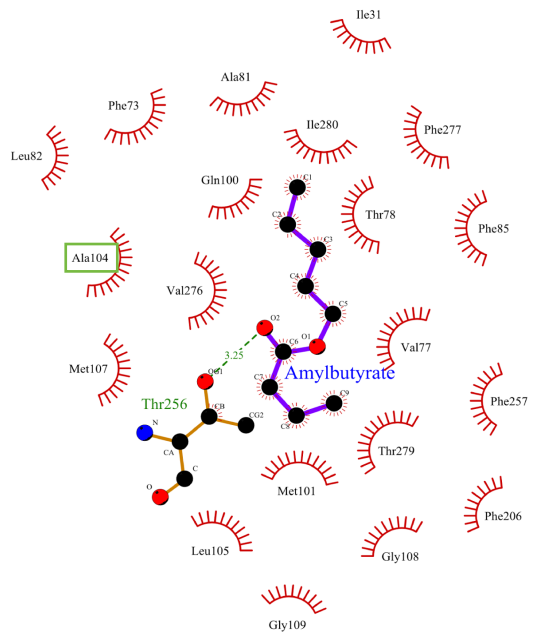

**hOR2AG1**

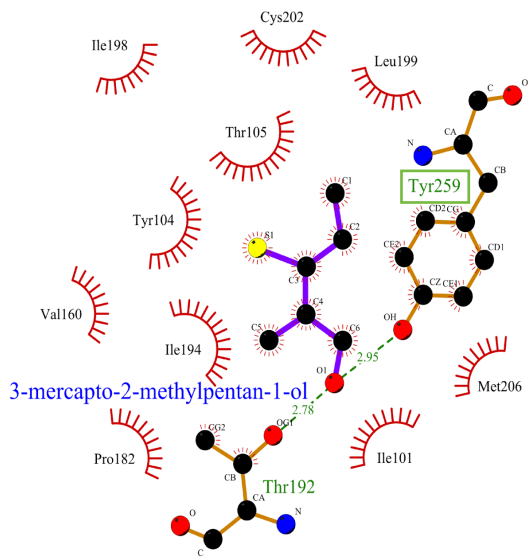

hOR2M3

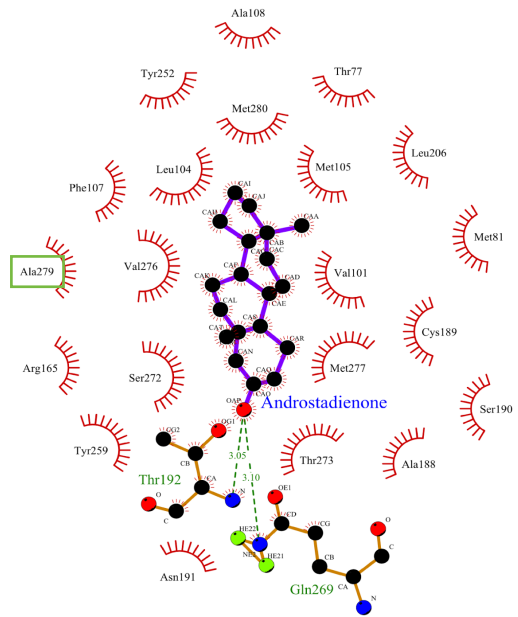

hOR7D4

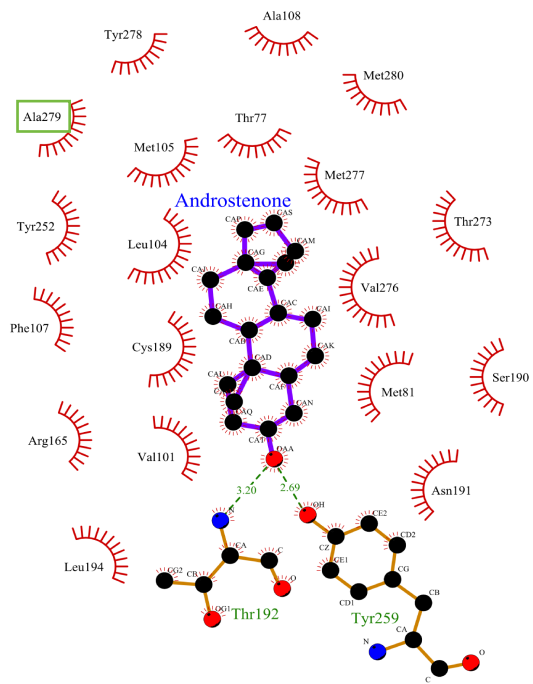

hOR7D4

**Supplementary Figure 3.** 2D representation of the agonist binding cavity predicted by Autodock Vina (Trott and Olson, 2010).

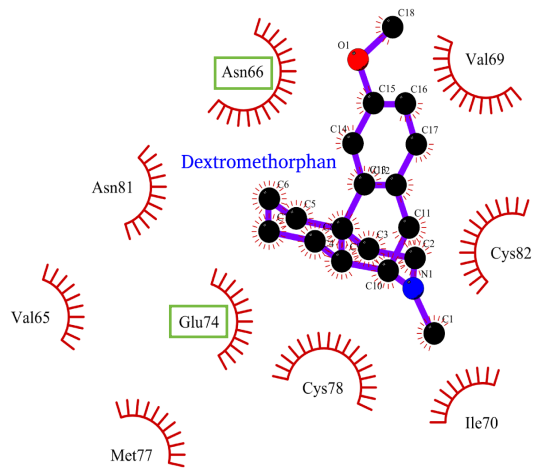

**hTAS2R1**

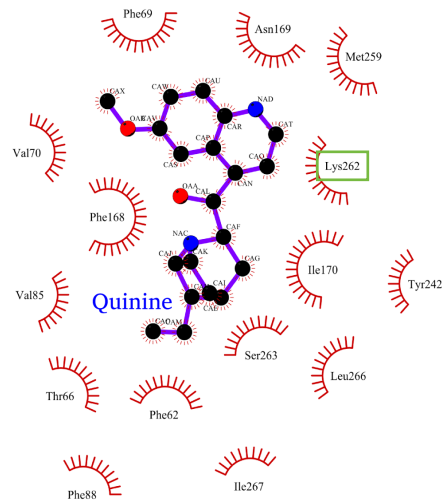

**hTAS2R4**

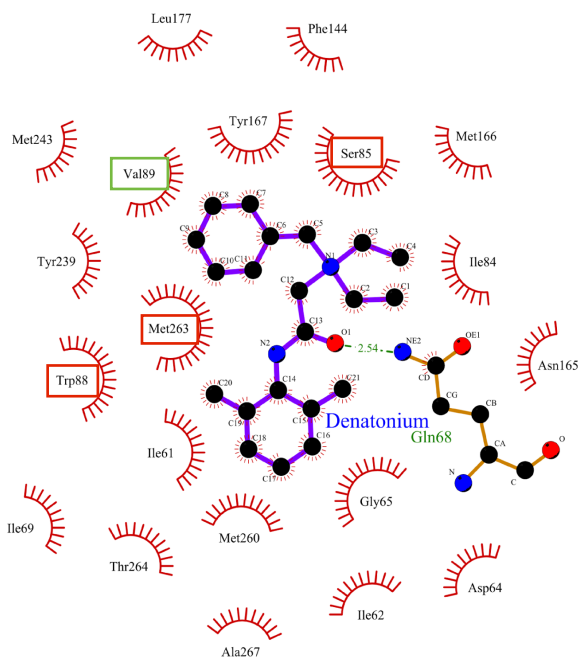

**hTAS2R10**

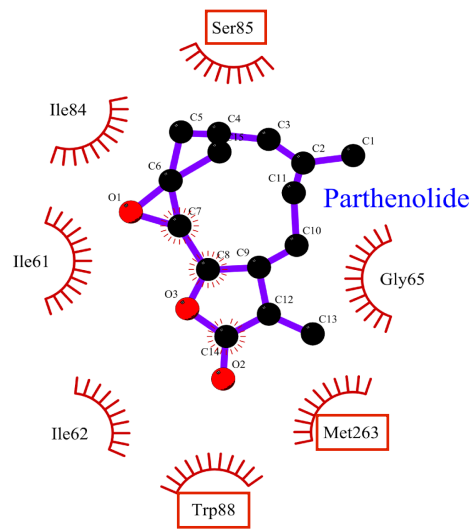

**hTAS2R10**

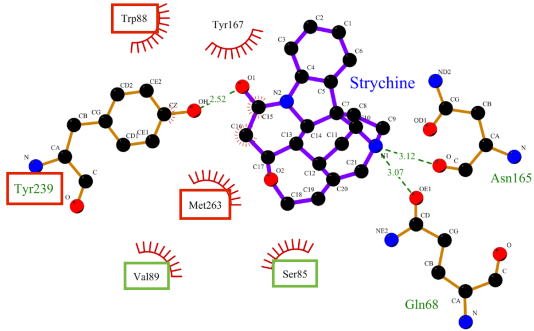

hTAS2R10

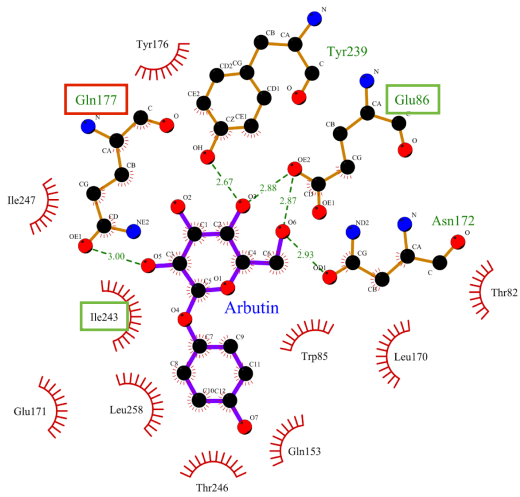

hTAS2R16

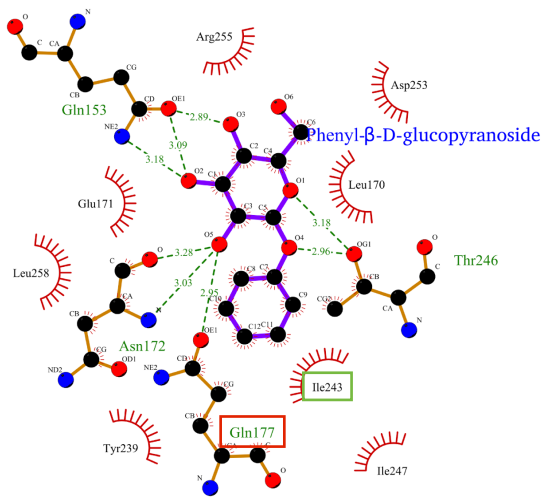

hTAS2R16

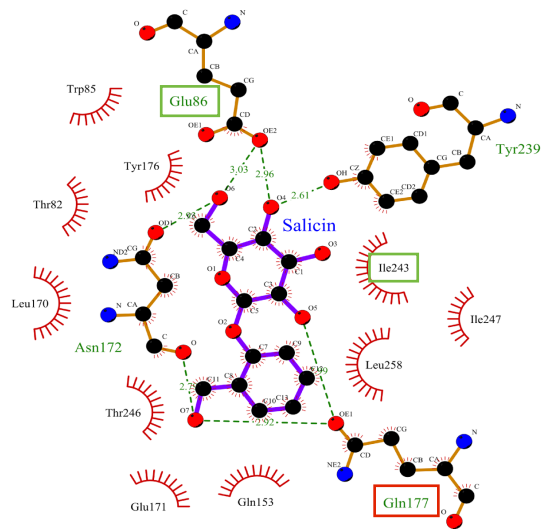

hTAS2R16



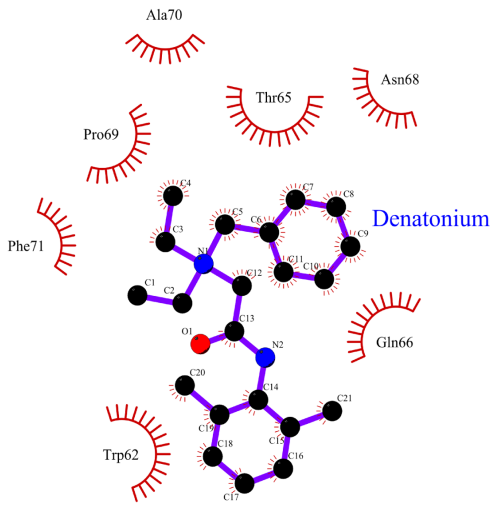

hTAS2R30

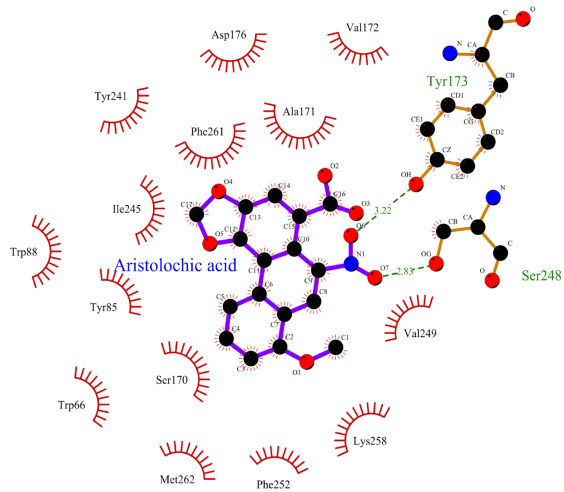

hTAS2R31

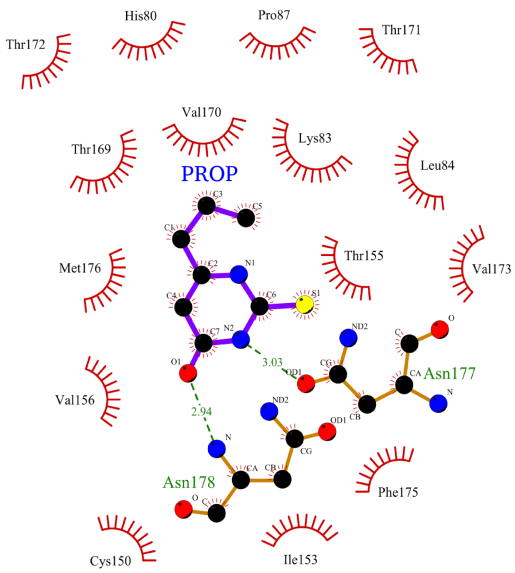

hTAS2R38

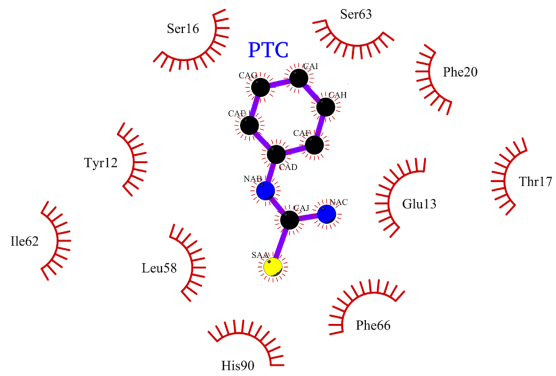

hTAS2R38

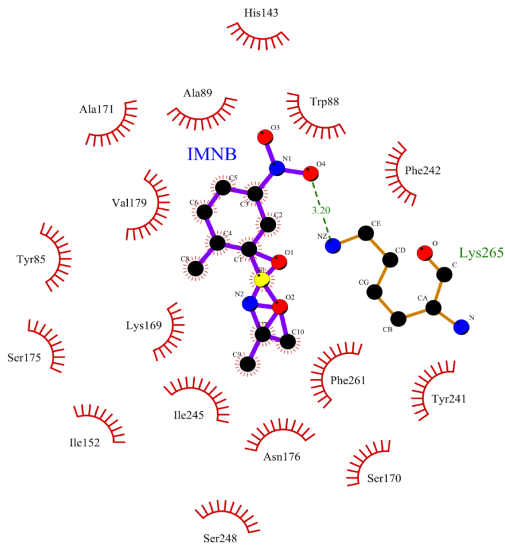

**hTAS2R43**

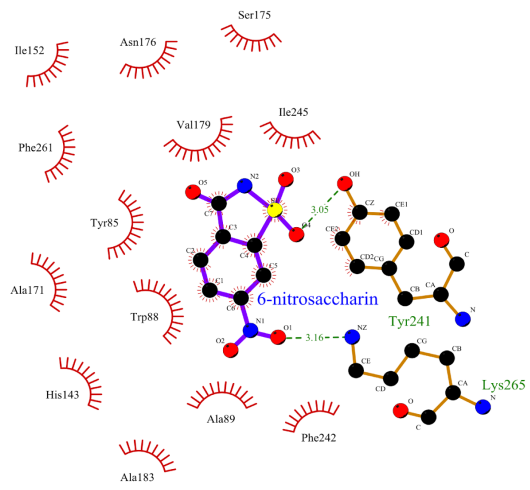

**hTAS2R43**

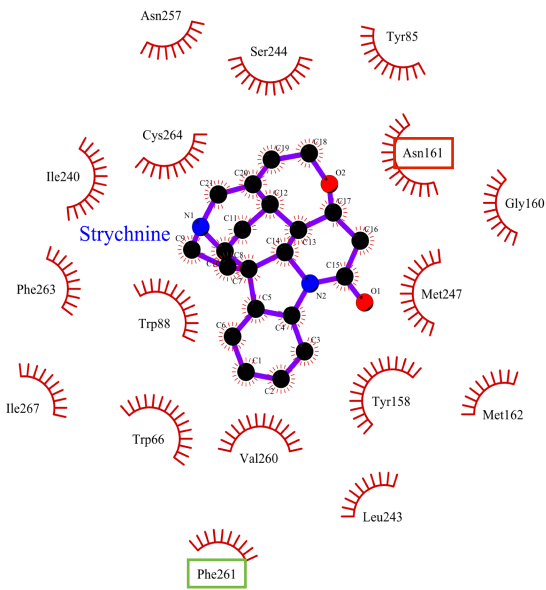

**hTAS2R46**

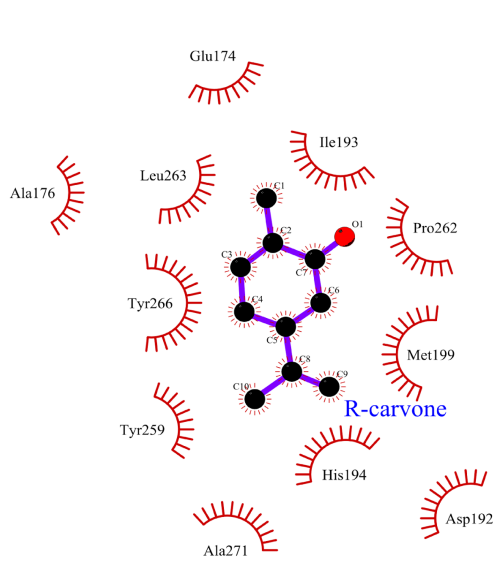

**hOR1A1**

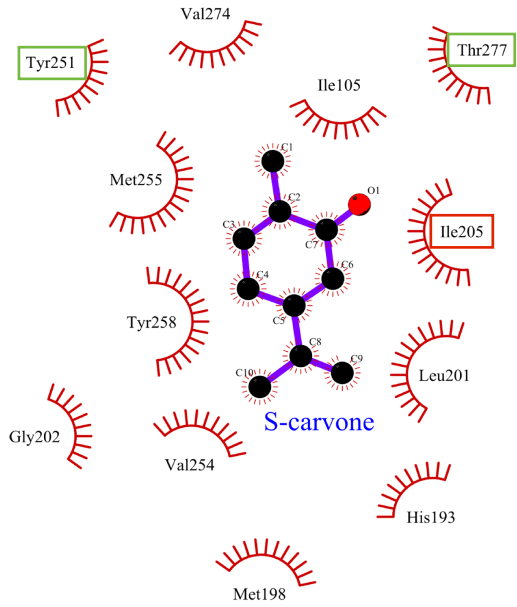

**hOR1A1**

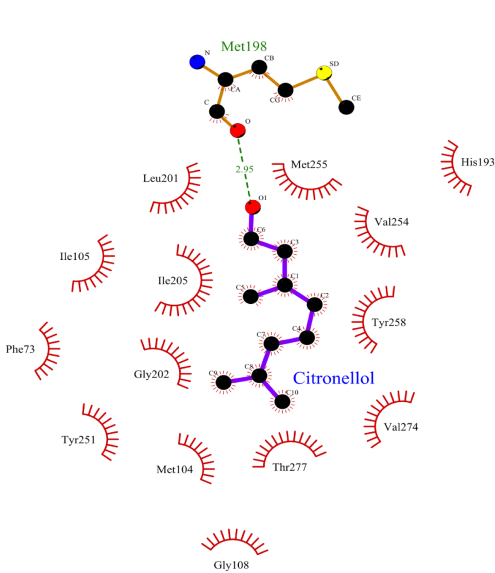

**hOR1A1**

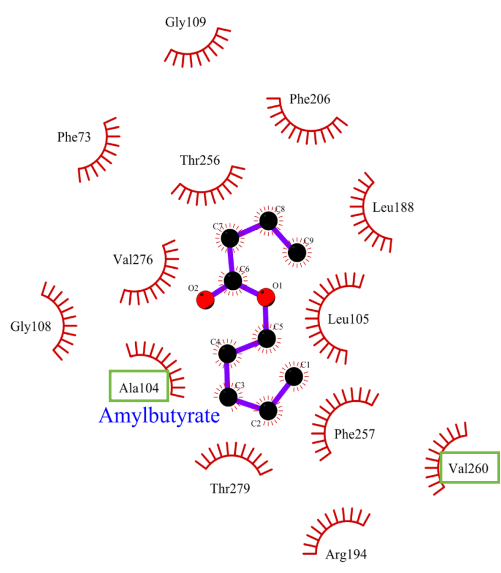

**hOR2AG1**

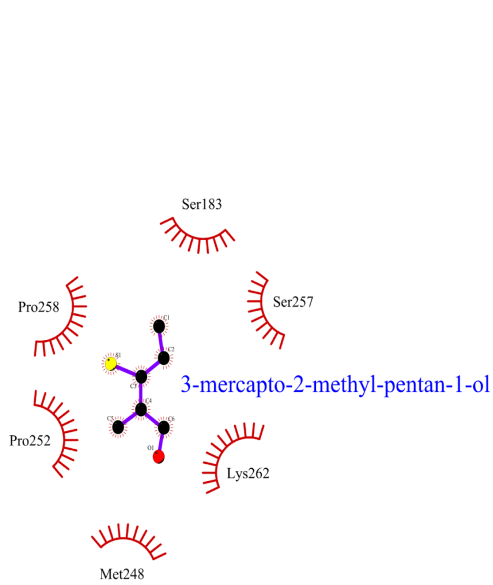

hOR2M3

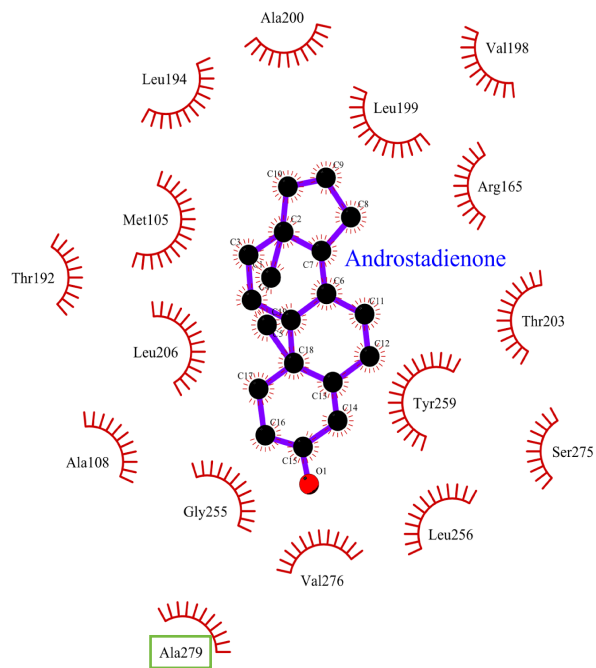

hOR7D4

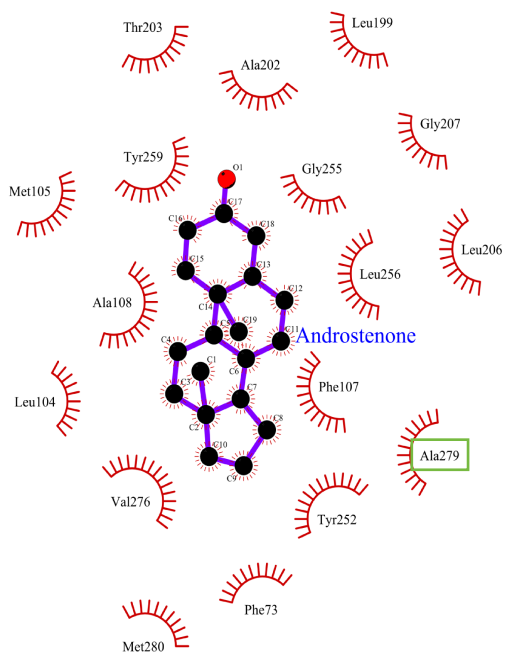

hOR7D4
