# Supplementary material for: Agonist Binding to Chemosensory Receptors: A Systematic Bioinformatics Analysis
Source: PubMed Central journal article supplement (PMC5592726; doi:10.3389/fmolb.2017.00063), 2017-09-06
Supplement: DataSheet2.pdf [file DataSheet2.pdf]

# Agonist binding to chemosensory receptors: a systematic bioinformatics analysis

## Supplementary Information

### Part 2

**Fabrizio Fierro<sup>1,†</sup>, Eda Suku<sup>2,†</sup>, Mercedes Alfonso-Prieto<sup>1,3,\*</sup>, Alejandro Giorgetti<sup>1,2,\*</sup>,  
Sven Cichon<sup>4,5,6</sup>, Paolo Carloni<sup>1,7,8</sup>**

<sup>1</sup> Computational Biomedicine, Institute for Advanced Simulation IAS-5 and Institute of Neuroscience and Medicine INM-9, Forschungszentrum Jülich, 52425 Jülich, Germany.

<sup>2</sup> Department of Biotechnology, University of Verona, Ca' Vignal 1, Strada le Grazie 15, 37134 Verona, Italy.

<sup>3</sup> Cécile and Oskar Vogt Institute for Brain Research, Medical Faculty, Heinrich Heine University Düsseldorf, Merowingerplatz 1a, 40225 Düsseldorf, Germany.

<sup>4</sup> Institute of Neuroscience and Medicine INM-1, Forschungszentrum Jülich, 52425 Jülich, Germany.

<sup>5</sup> Institute for Human Genetics, Department of Genomics, Life&Brain Center, University of Bonn, Sigmund-Freud-Straße 25, 53127 Bonn, Germany.

<sup>6</sup> Division of Medical Genetics, Department of Biomedicine, University of Basel, Switzerland.

<sup>7</sup> Department of Physics, Rheinisch-Westfälische Technische Hochschule Aachen, 52062 Aachen, Germany.

<sup>8</sup> VNU Key Laboratory "Multiscale Simulation of Complex Systems", VNU University of Science, Vietnam National University, Hanoi, Viet Nam.

<sup>†</sup> These authors have contributed equally to this work.

**\* Correspondence:**

Mercedes Alfonso-Prieto, [m.alfonso-prieto@fz-juelich.de](mailto:m.alfonso-prieto@fz-juelich.de)

Alejandro Giorgetti, [a.giorgetti@fz-juelich.de](mailto:a.giorgetti@fz-juelich.de)

**Supplementary Figure 4.** 2D representation of the agonist binding cavity predicted by Glide (Friesner et al., 2004).

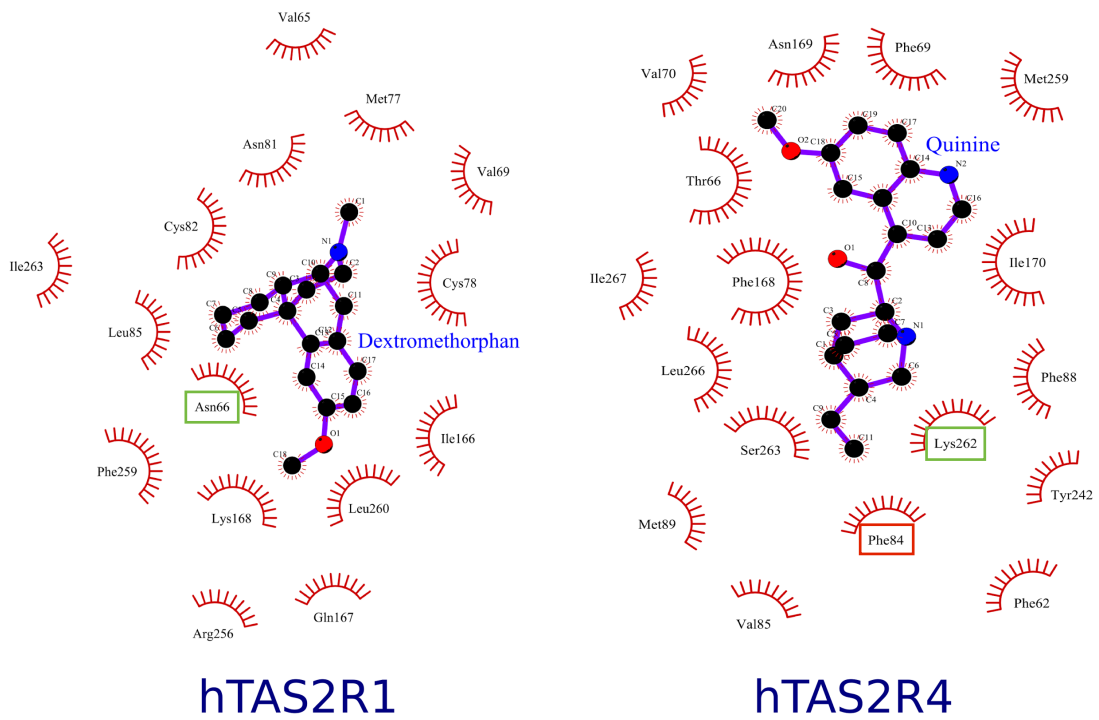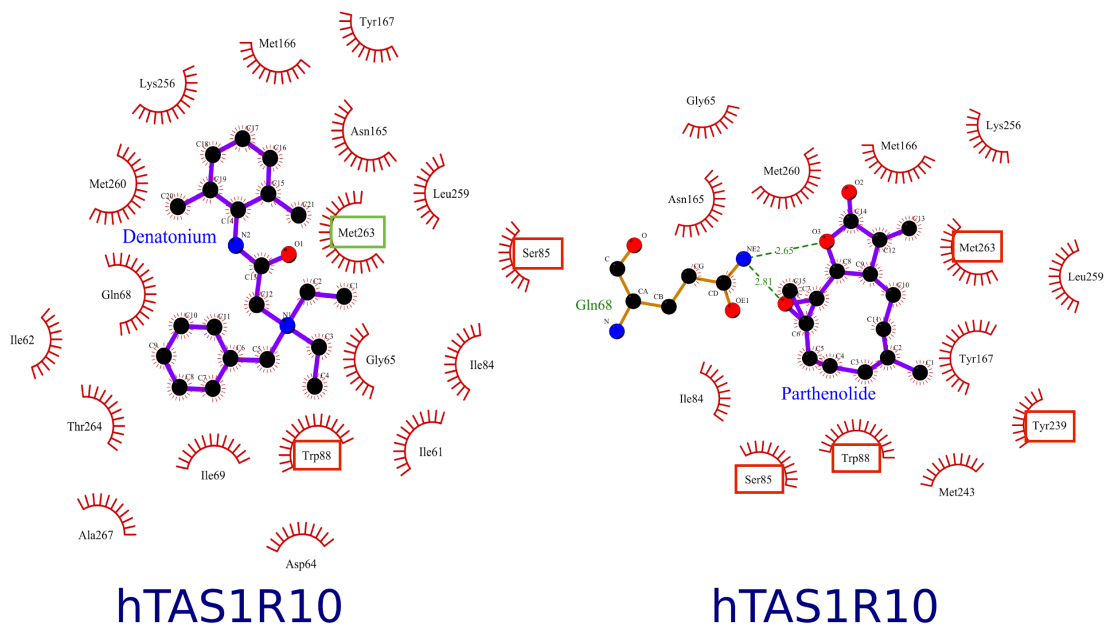

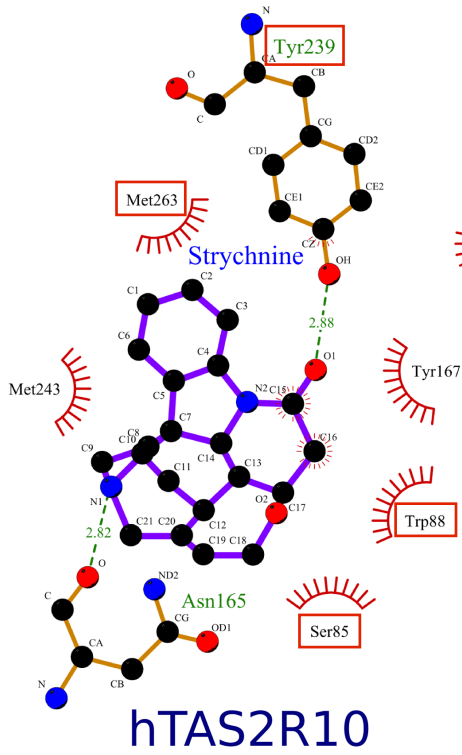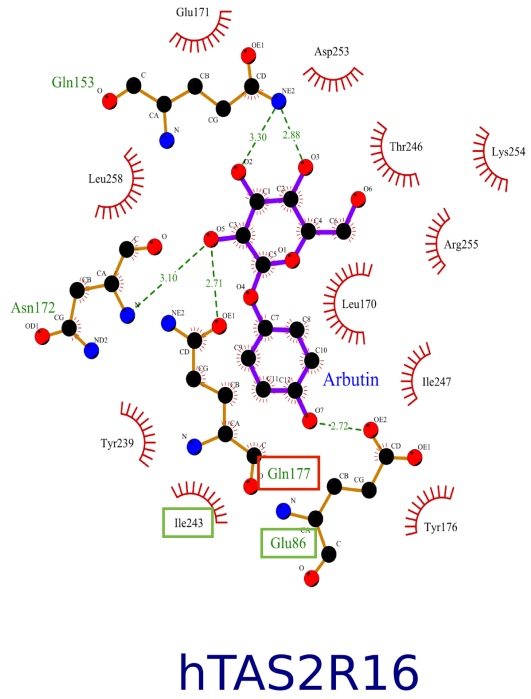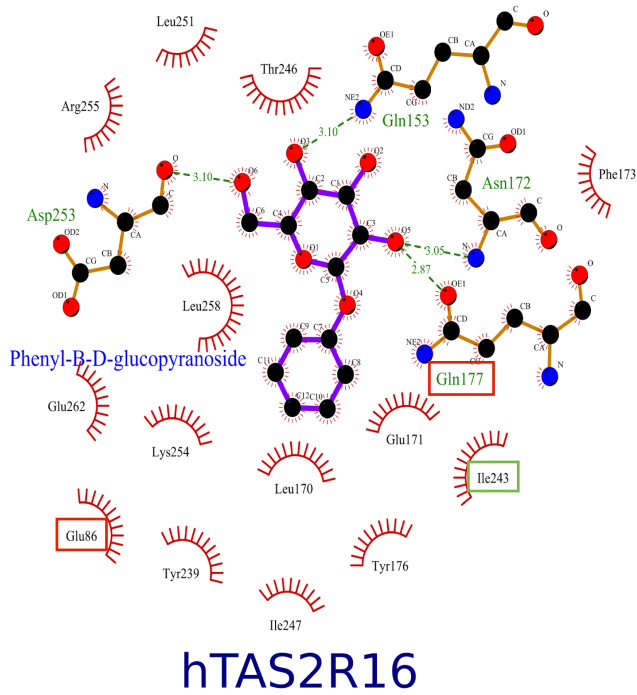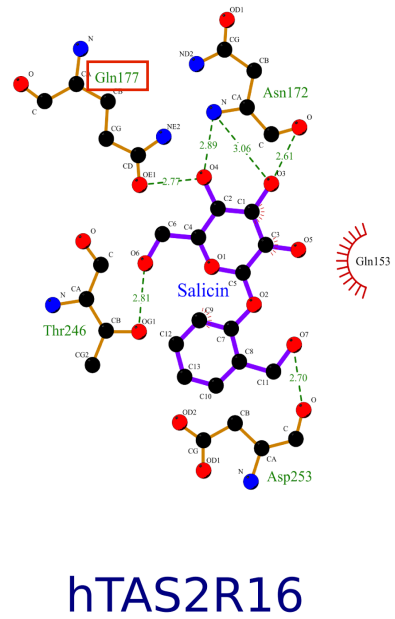

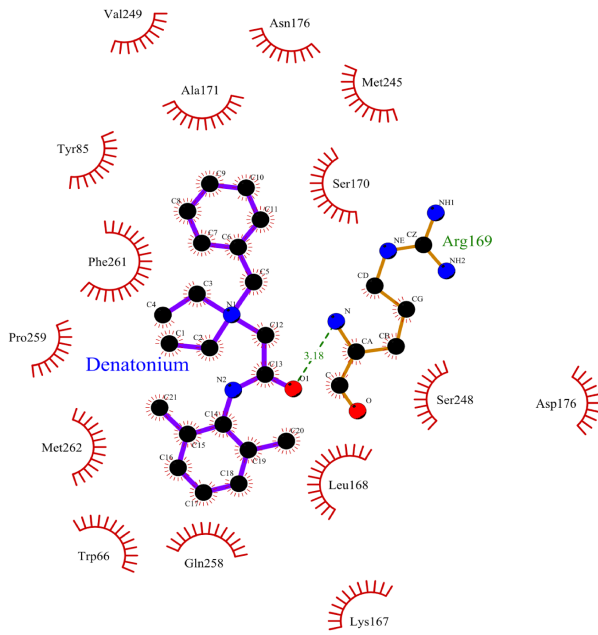

hTAS2R30

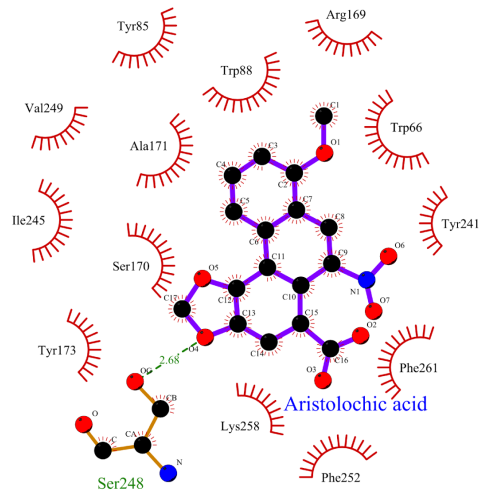

hTAS2R31

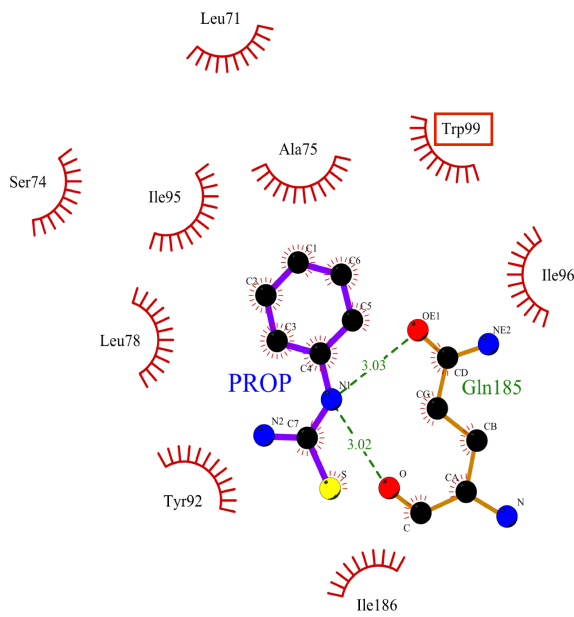

hTAS2R38

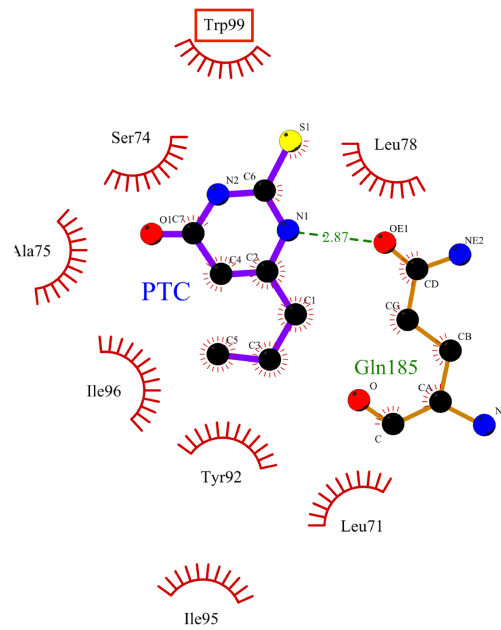

hTAS2R38



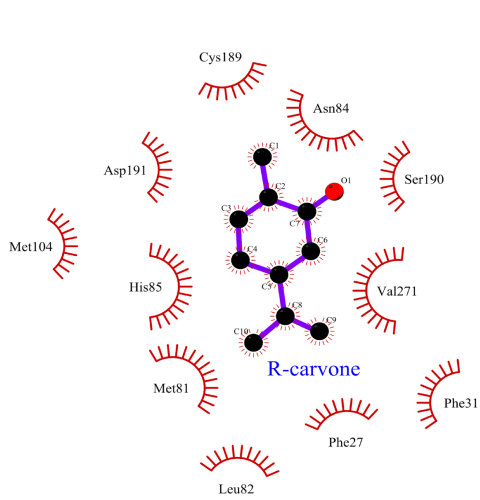

**hOR1A1**

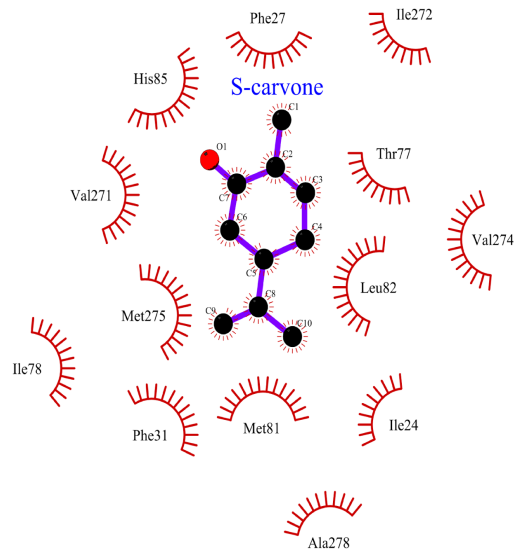

**hOR1A1**

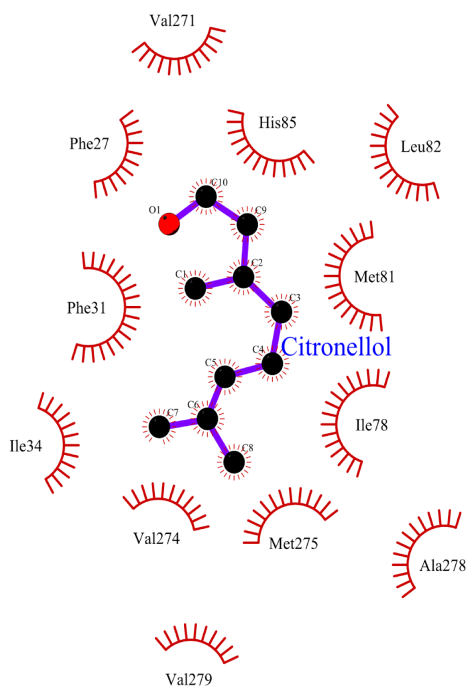

**hOR1A1**

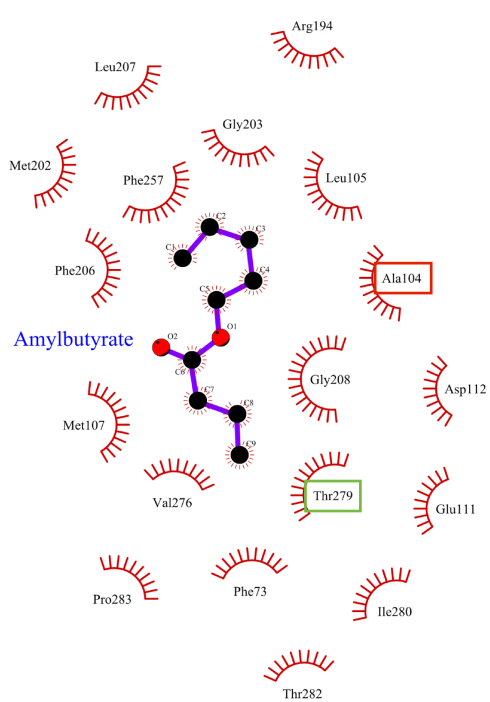

**hOR2AG1**

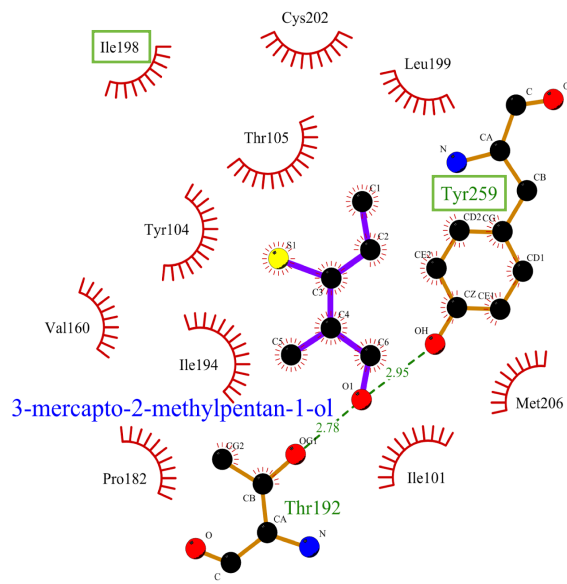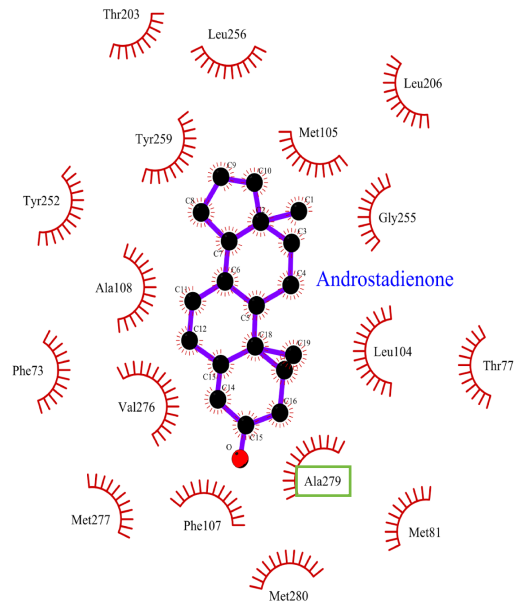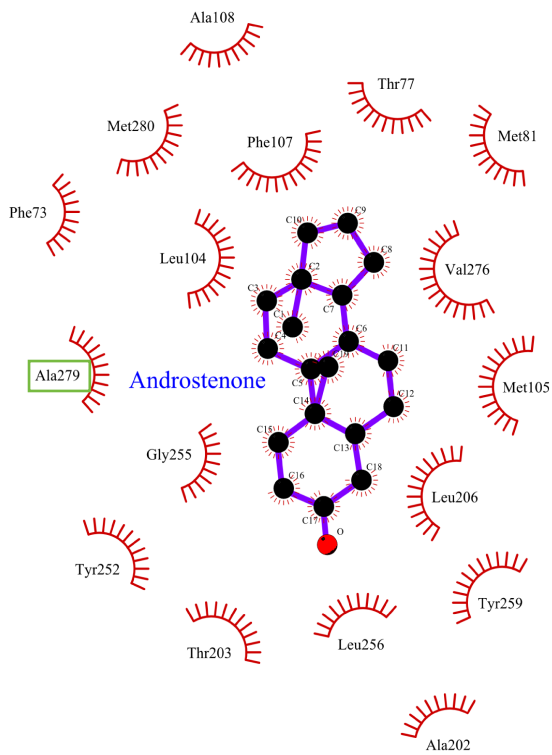

## Section 4: Accuracy of the MM/CG simulation results

**Supplementary Table 2.** Analysis of the simulation data of the three hChemGPCR/agonist complexes for which both experimental studies and MM/CG molecular dynamics have been performed (Marchiori et al., 2013; Sandal et al., 2015). The first column lists those three hTAS2R/agonist complexes, along with the ligand charge in parentheses. The second column shows the residues for which mutagenesis data are available. Residues belonging to the bottom half of the receptor, to the N- or C-termini, and to the TM8 have been omitted, as they are well outside the canonical orthosteric binding site of class A GPCRs (Venkatakrisnan et al., 2013) and thus they are expected not to be involved in ligand binding. In the third column, residues are numbered accordingly to the GPCRdb numbering scheme (Isberg et al. 2015) of their template, i.e. the human  $\beta$ 2 adrenoceptor (PDB code: 4LDE) for the two hTAS2R38 complexes and the human dopamine D3 receptor (PDB code: 3PBL) for hTAS2R46 (Sandal et al., 2015). In the fourth column, interpretation of  $EC_{50}$  values for the corresponding residues is reported using the following nomenclature: c = change in  $EC_{50}$ ; nc = no significant change in  $EC_{50}$ . In the following columns is indicated whether the residue interacts with the ligand along the MM/CG simulation (Y=yes, N=no) and the prediction outcome for this residue (TP=true positive, TN=true negative, FP=false positive, FN=false negative, see the main text and Figure 3 for the definition), depending on the presence or absence of an actual chemical interaction.

| hChem-GPCR/<br>agonist complex<br>(ligand charge) | Experimental data |          |           | MMCG        |                                 |
|---------------------------------------------------|-------------------|----------|-----------|-------------|---------------------------------|
|                                                   | Residue           | Position | $EC_{50}$ | Interaction | Prediction                      |
| hTAS2R38/<br>Phenylthiocarbamide<br>(0)           | W99               | 3.32     | nc        | N           | TN                              |
|                                                   | N103              | 3.36     | c         | Y           | TP                              |
|                                                   | N179              | ECL2     | nc        | N           | TN                              |
|                                                   | R181              | ECL2     | nc        | N           | TN                              |
|                                                   | N183              | ECL2     | nc        | N           | TN                              |
|                                                   | F197              | 5.42     | nc        | Y           | FP                              |
|                                                   | W201              | 5.46     | c         | Y           | TP                              |
|                                                   | F255              | 6.47     | nc        | N           | TN                              |
|                                                   | F264              | 6.56     | c         | Y           | TP                              |
|                                                   |                   |          |           |             | Recall: 1.00<br>Precision: 0.75 |



| hChem-GPCR/<br>agonist complex<br>(ligand charge) | Experimental data |          |                  | MMCG        |                                 |
|---------------------------------------------------|-------------------|----------|------------------|-------------|---------------------------------|
|                                                   | Residue           | Position | EC <sub>50</sub> | Interaction | Prediction                      |
| hTAS2R38/<br>propylthiouracil<br>(0)              | W99               | 3.32     | nc               | N           | TN                              |
|                                                   | M100              | 3.33     | nc               | N           | TN                              |
|                                                   | N103              | 3.36     | c                | Y           | TP                              |
|                                                   | N179              | ECL2     | nc               | N           | TN                              |
|                                                   | R181              | ECL2     | nc               | N           | TN                              |
|                                                   | N183              | ECL2     | nc               | N           | TN                              |
|                                                   | F197              | 5.42     | c                | Y           | TP                              |
|                                                   | W201              | 5.46     | c                | Y           | TP                              |
|                                                   | F197              | 5.42     | c                | Y           | TP                              |
|                                                   | F264              | 6.56     | c                | Y           | TP                              |
|                                                   |                   |          |                  |             | Recall: 1.00<br>Precision: 1.00 |
| hTAS2R46/<br>strychnine<br>(+1)                   | E70               | 2.65     | c                | Y           | TP                              |
|                                                   | L71               | ECL1     | c                | Y           | TP                              |
|                                                   | I82               | 3.26     | c                | Y           | TP                              |
|                                                   | N92               | 3.36     | c                | Y           | TP                              |
|                                                   | N150              | ECL2     | nc               | N           | TN                              |
|                                                   | N161              | ECL2     | nc               | N           | TN                              |
|                                                   | N176              | 5.39     | c                | Y           | TP                              |
|                                                   | Y241              | 6.51     | c                | Y           | TP                              |
|                                                   | E253              | ECL3     | c                | Y           | TP                              |
|                                                   | F261              | 7.35     | c                | Y           | TP                              |
|                                                   | E265              | 7.39     | c                | Y           | TP                              |
|                                                   | A268              | 7.42     | c                | Y           | TP                              |
|                                                   | F269              | 7.43     | c                | Y           | TP                              |
|                                                   |                   |          |                  |             | Recall: 1.00<br>Precision: 1.00 |

## Section 5: Bioinformatics analyses of receptors' activation

**Supplementary Table 3.** Available experimental mutagenesis data on residues putatively involved in receptor activation in hTAS2Rs. The generic numbering for class A GPCRs (Isberg et al. 2015) (based on the GPCRdb numbering of the template used in this work, PDB code: 4LDE) and the GPCR residue numbering used in the original publication are listed in columns 1 and 2, respectively. The human bitter taste receptor and the corresponding mutation reported in the literature, together with its activation-related effect, are indicated in columns 3-5, with the corresponding reference in column 6. Finally, column 7 lists the sequence conservation of this position in human bitter taste receptors. The novel position identified in this work (7.52) is highlighted in yellow.

| residue numbering |                | receptor | mutant       | effect                                   | reference              | Conservation in hTAS2Rs |
|-------------------|----------------|----------|--------------|------------------------------------------|------------------------|-------------------------|
| GPCRdb class A    | original paper |          |              |                                          |                        |                         |
| 1.50              | 1.50           | hTAS2R1  | N24A<br>N24D | Loss of agonist-induced signaling (>90%) | (Singh et al., 2011)   | 92%                     |
| 1.53              | 1.53           | hTAS2R1  | I27A<br>I27V | Receptor hyperactivity                   | (Singh et al., 2011)   | 96%                     |
| 2.50              | 2.54           | hTAS2R1  | R55A         | Receptor hyperactivity                   | (Singh et al., 2011)   | 96%                     |
| 5.63              | 5.53           | hTAS2R4  | H214A        | Constitutively active mutant             | (Pydi et al., 2014)    | 96%                     |
| ICL3              | ICL3           | hTAS2R4  | Q216A        | Constitutively active mutant             | (Pydi et al., 2014)    | <i>Not conserved</i>    |
| 6.35              | ICL3           | hTAS2R4  | V234A        | Constitutively active mutant             | (Pydi et al., 2014)    | <i>Not conserved</i>    |
| 6.38              | ICL3           | hTAS2R4  | M237A        | Constitutively active mutant             | (Pydi et al., 2014)    | <i>Not conserved</i>    |
| 7.50              | 7.47           | hTAS2R4  | S285A        | Constitutively active mutant             | (Pydi et al., 2014)    | S= 68%<br>P= 28%        |
| <b>7.52</b>       | <b>7.52</b>    | hTAS2R38 | I296V        | Change in activation of the receptor     | (Biarnes et al., 2010) | I/L/V = 92%             |

**Supplementary Table 4.** Effect of mutations in residues involved in the activation network of class A GPCRs. Residues experimentally shown as important for activation are indicated with the generic residue numbering for class A GPCRs (Isberg et al. 2015). The novel position 7.52 identified in this work is highlighted in yellow.

| residue numbering | receptor             | mutants    | effect                                                                                                                                                     | reference                |
|-------------------|----------------------|------------|------------------------------------------------------------------------------------------------------------------------------------------------------------|--------------------------|
| 1.50              | TSHR                 | N1.50D     | Disrupting important, architecture-stabilizing intramolecular interactions and ultimately leading to the complete intracellular retention of the receptor. | (Labadi et al., 2015)    |
| 2.46              | A2aAR                | L2.46A     | Stabilization; Increase in binding affinity of agonist; 50-fold decrease of binding affinity for antagonist                                                | (Lebon et al., 2011)     |
|                   | Muscarinic M1 and M5 | L2.46A     | Reduced efficacy                                                                                                                                           | (Hulme, 2013)            |
|                   | TSHR                 | L2.46A     | Increased basal activity                                                                                                                                   | (Urizar et al., 2005)    |
|                   | TSHR                 | L2.46I     | No effect                                                                                                                                                  | (Urizar et al., 2005)    |
|                   | TSHR                 | L2.46W     | Decreasing basal activity                                                                                                                                  | (Urizar et al., 2005)    |
|                   | Rhodopsin            | L2.46A     | Increasing basal activity                                                                                                                                  | (Madabushi et al., 2004) |
| 2.50              | Opioid               | D2.50A     | Reducing agonist-dependent signaling of some GPCRs, while maintaining ligand binding and often basal signaling                                             | (Fenalti et al., 2014)   |
| 3.39              | Opioid               | S3.39A     | Disrupting of normal ligand dependent signaling                                                                                                            | (Katritch et al., 2014)  |
| 3.40              | Muscarinic M1 and M5 | V3.40A     | Increasing agonist affinity                                                                                                                                | (Hulme, 2013)            |
|                   | MOR136-1             | S3.40A     | Abolishing agonist binding                                                                                                                                 | (Ho et al., 2015)        |
|                   | Histamine H1R        | I3.40A/G   | Lower basal activity and lower agonist response                                                                                                            | (Sansuk et al., 2011)    |
|                   | TSHR                 | V3.40A     | Constitutive activity                                                                                                                                      | (Duprez et al., 1994)    |
| 3.43              | S1P1                 | L3.43E/G   | Abolishing activation                                                                                                                                      | (Fujiwara et al., 2007)  |
|                   | B2AR                 | L3.43R/K/A | Increased basal activity                                                                                                                                   | (Tao et al., 2000)       |
|                   | Muscarinic M1        | L3.43A     | Constitutive activity                                                                                                                                      | (Lu and Hulme, 1999)     |

|                     |                |                      |                                                                                                                                                   |                                                                              |
|---------------------|----------------|----------------------|---------------------------------------------------------------------------------------------------------------------------------------------------|------------------------------------------------------------------------------|
| <b>3.43 (cont.)</b> | TSHR           | L3.43Q/N/R           | Constitutive activity                                                                                                                             | (Kosugi et al., 2000)<br>(Nishihara et al., 2006)<br>(Trulzsch et al., 2001) |
|                     | C5A            | L3.43A               | Constitutive activity                                                                                                                             | (Baranski et al., 1999)                                                      |
|                     | CB1            | L3.43A               | Constitutive activity;<br>elevated basal cAMP accumulation;<br>enhanced affinity for agonists and<br>diminished affinity for inverse<br>agonists. | (D'Antona et al., 2006)                                                      |
| <b>5.54</b>         | FSHR           | I5.54L/T/F/N         | Constitutive activity                                                                                                                             | (Tao, 2008)                                                                  |
| <b>5.58</b>         | TSHR           | Y5.58F               | Decreasing basal activity                                                                                                                         | (Kleinau et al., 2008)                                                       |
|                     | B2AR           | Y5.58A               | Stabilization of inactive<br>conformation                                                                                                         | (Tate and Schertler, 2009)                                                   |
| <b>6.35</b>         | Rhodopsin      | R6.35C               | Decreasing basal activity                                                                                                                         | (Dunham and Farrens, 1999)                                                   |
| <b>6.37</b>         | Vasopressin V2 | I6.37L               | Reducing ability to bind the G-<br>protein                                                                                                        | (Venkatakrishnan et al., 2016)                                               |
| <b>6.39</b>         | 5-HT2A         | I6.39A               | Increasing affinity for agonist<br>(indirect effect)                                                                                              | (Shapiro et al., 2002)                                                       |
|                     | AT1R           | A6.39C               | Cysteine mutant is sensitive to<br>treatment with MTSEA                                                                                           | (Martin et al., 2007)                                                        |
| <b>6.40</b>         | C5A            | V6.40A               | Increasing basal activity                                                                                                                         | (Baranski et al., 1999)                                                      |
|                     | Muscarinic M5  | I6.40S               | Constitutive activity                                                                                                                             | (Spalding et al., 1998)                                                      |
|                     | Histamine H1R  | I6.40E/G/A<br>/R/K/S | Constitutive activity                                                                                                                             | (Sansuk et al., 2011)<br>(Bakker et al., 2008)                               |
|                     | Rhodopsin      | M6.40Y               | Constitutive activity                                                                                                                             | (Deupi et al., 2012)                                                         |
|                     | AT1R           | I6.40T               | Increasing basal activity                                                                                                                         | (Parnot et al., 2000)                                                        |
|                     | Melanocortin-4 | L6.40Q               | Increasing basal activity                                                                                                                         | (Vaisse et al., 2000)                                                        |
|                     | TSHR           | L6.40F               | Increasing basal activity                                                                                                                         | (Tonacchera et al., 1998)                                                    |

|                     |                             |                       |                                                                   |                                |
|---------------------|-----------------------------|-----------------------|-------------------------------------------------------------------|--------------------------------|
| <b>6.40 (cont.)</b> | Lutropin-choriogonadotropic | L6.40A                | Constitutive activity                                             | (Fanelli, 2000)                |
|                     | S1P1                        | V6.40A/T              | Reducing activation                                               | (Fujiwara et al., 2007)        |
|                     | S1P1                        | V6.40L                | Abolishing activation                                             | (Fujiwara et al., 2007)        |
| <b>6.44</b>         | Muscarinic M5               | F6.44S/T/L            | Constitutive activity                                             | (Spalding et al., 1998)        |
|                     | Rhodopsin                   | F6.44T/V              | Increasing basal activity                                         | (Han et al., 1997)             |
|                     | Rhodopsin                   | F6.44A                | No significant change in basal activity                           | (Han et al., 1997)             |
|                     | Rhodopsin                   | F6.44W                | Decreasing basal activity                                         | (Han et al., 1997)             |
|                     | A1B adrenergic              | F6.44L                | Increasing basal activity                                         | (Greasley et al., 2002)        |
|                     | A1B adrenergic              | F6.44Y                | No significant change in basal activity                           | (Greasley et al., 2002)        |
|                     | A1B adrenergic              | F6.44A/G              | Decreasing basal activity                                         | (Greasley et al., 2002)        |
|                     | Ghrelin                     | F6.44Y/L              | Decreasing basal activity                                         | (Valentin-Hansen et al., 2012) |
|                     | Ghrelin                     | F6.44A                | Increasing basal activity                                         | (Valentin-Hansen et al., 2012) |
|                     | GPR119                      | F6.44A                | Decreasing basal activity; loss of agonist-induced response       | (Valentin-Hansen et al., 2012) |
|                     | B2AR                        | F6.44A                | Decreasing basal activity; loss of agonist-induced response       | (Valentin-Hansen et al., 2012) |
|                     | NK1                         | F6.44A                | Decreasing basal activity; loss of agonist-induced response       | (Valentin-Hansen et al., 2012) |
|                     | GPR39                       | L6.44A/Y              | Decreasing basal activity                                         | (Valentin-Hansen et al., 2012) |
|                     | GPR39                       | L6.44F                | Decreased basal activity; loss of agonist-induced response        | (Valentin-Hansen et al., 2012) |
| TSHR                | D6.44A/E/H/Y                | Constitutive activity | (Porcellini et al., 1994; Parma et al., 1997; Russo et al., 1996) |                                |

|             |                      |          |                                                                                 |                                       |
|-------------|----------------------|----------|---------------------------------------------------------------------------------|---------------------------------------|
| <b>6.48</b> | muscarinic M1 and M5 | W6.48A   | Reducing agonist response                                                       | <i>(Hulme et al. 2013)</i>            |
|             | Ghrelin receptor     | W6.48A/H | Abolishing basal activity; reduced agonist response                             | <i>(Holst et al., 2010)</i>           |
|             | GPR119               | W6.48A   | Abolishing basal activity; reduced agonist response                             | <i>(Holst et al., 2010)</i>           |
|             | GPR39                | W6.48A   | Abolishing basal activity; reduced agonist response                             | <i>(Holst et al., 2010)</i>           |
|             | B2AR                 | W6.48A   | Abolishing basal activity; reduced agonist response                             | <i>(Holst et al., 2010)</i>           |
|             | S1P1                 | W6.48A/E | Impaired activation                                                             | <i>(Fujiwara et al., 2007)</i>        |
| <b>7.45</b> | adenosine            | N7.45A   | Removal of modulator allosteric effects but little effect on agonist binding    | <i>(Gao et al., 2003)</i>             |
| <b>7.49</b> | Opioid               | N7.49D   | Mutation eliminated detectable binding of either [3H]diprenorphine or [3H]DAMGO | <i>(Xu et al., 1999)</i>              |
| <b>7.52</b> | TSHR                 | L7.52V   | Increase of basal activity                                                      | <i>(Russo et al., 1999)</i>           |
|             | A2bAR                | V7.52A   | Reducing agonist-induced activation                                             | <i>(Liu et al., 2015)</i>             |
|             | Melanocortin-1       | I7.52T   | Reducing basal activity                                                         | <i>(Lubrano-Bertheliet al., 2006)</i> |
| <b>7.53</b> | Vasopressin V2       | Y7.53F/A | Reduced ability to bind to G-protein                                            | <i>(Venkatakishnan et al., 2016)</i>  |

**Supplementary Table 5.** Conservation of residues in position 7.52 across human class A GPCRs, hTAS2Rs and hORs.

| Residue conservation percentage |         |       |       |                 |
|---------------------------------|---------|-------|-------|-----------------|
| <b>Class A hGPCRs</b>           | I=31.7% | L=30% | V=16% | M,F,Y,C=1% each |
| <b>hTAS2Rs</b>                  | I=76%   | L=12% | V=4%  | S,Q=4% each     |
| <b>hORs</b>                     | I=88%   | V=9%  | L=1%  | T,A,S<1% each   |

**Supplementary Figure 5.** Interactions of the residue in position 7.52 in the mammalian class A GPCR active/inactive structure pairs solved by X-ray crystallography. Inactive structures are shown in green, whereas active structures are in orange. The corresponding PDB codes are listed in Table 4 in the main text.

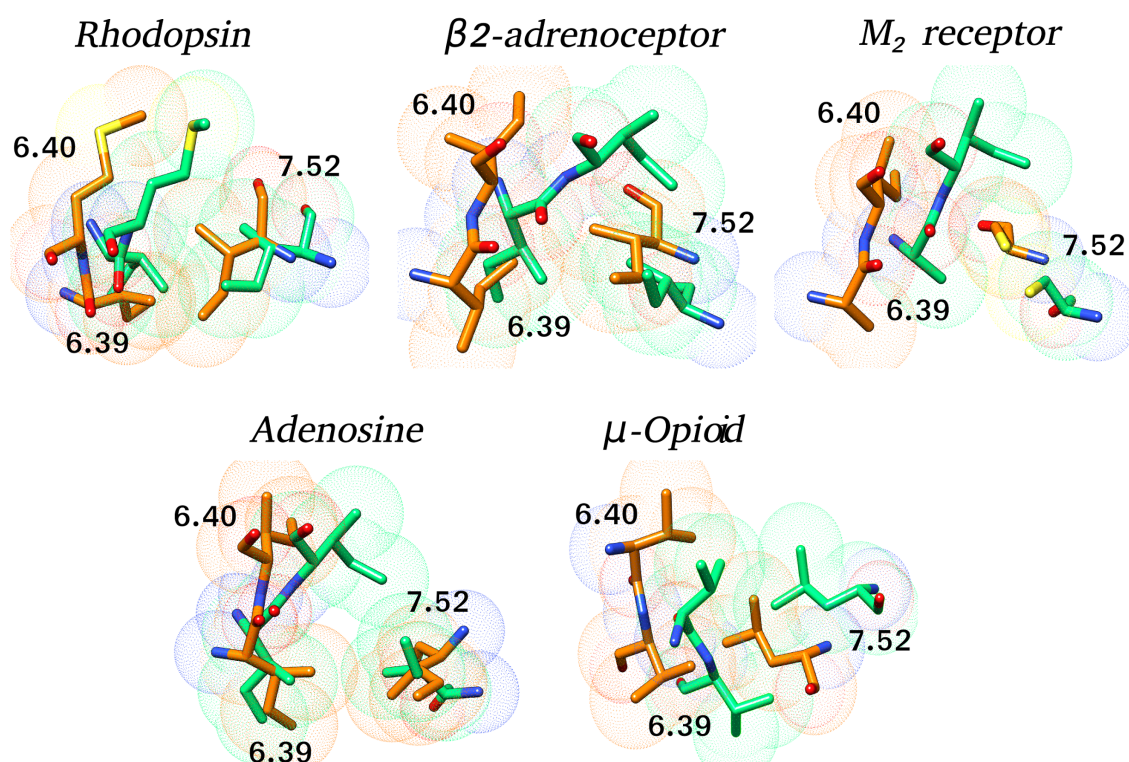

## Section 6: Further details of the bioinformatics analysis

**Supplementary Table 6.** UniProt accession numbers of the hTAS2Rs' and hORs' sequences used in this work.

| Human bitter taste receptors |            |          |            | Human odorant receptors |            |
|------------------------------|------------|----------|------------|-------------------------|------------|
| Receptor                     | UniProt ID | Receptor | UniProt ID | Receptor                | UniProt ID |
| hTAS2R1                      | Q9NYW7     | hTAS2R31 | P59538     | hOR2AG1                 | Q9H205     |
| hTAS2R10                     | Q9NYW0     | hTAS2R38 | P59533     | hOR2M3                  | Q8NG83     |
| hTAS2R16                     | Q9NYV7     | hTAS2R43 | P59542     | hOR1A1                  | Q9P1Q5     |
| hTAS2R30                     | P59541     | hTAS2R46 | P59540     | hOR7D4                  | Q8NG98     |

**Supplementary Table 7.** Predicted binding cavity residues for hChem-GPCRs. The hChem-GPCRs studied in this work are indicated on the left and the putative binding residues, as predicted by fpocket (Le Guilloux et al., 2009), on the right.

| hChem-GPCR | fpocket predicted residues                                                                                                                                                                                                                                                                                  |
|------------|-------------------------------------------------------------------------------------------------------------------------------------------------------------------------------------------------------------------------------------------------------------------------------------------------------------|
| hTAS2R1    | 1 2 4 5 6 9 61 62 65 66 68 69 70 71 72 73 74 75 77 78 79 81 82 85 86<br>90 139 140 143 144 147 149 150 151 153 155 156 159 160 166 167<br>168 169 170 172 174 175 178 182 240 243 244 247 248 251 252 254<br>255 256 257 259 260 261 263 264                                                                |
| hTAS2R4    | 66 69 70 73 74 79 88 89 92 93 96 100 146 150 156 172 173 174 176<br>180 181 184 185 188 189 190 192 193 239 240 243 244 246 247 248<br>250 251 263 264 266 267 270 271 273                                                                                                                                  |
| hTAS2R10   | 3 5 6 9 12 13 16 17 20 57 58 61 62 64 65 66 67 68 69 70 71 72 73 74<br>75 76 80 81 84 85 88 89 92 163 164 165 166 167 174 177 178 236 239<br>240 243 246 252 254 255 256 257 259 260 261 263 264 266 267 268<br>271                                                                                         |
| hTAS2R16   | 6 10 14 59 63 64 66 67 68 70 71 72 74 75 76 77 78 79 81 82 85 86 88<br>89 92 93 94 141 142 144 146 147 148 150 153 155 156 157 161 162<br>164 165 166 167 168 169 170 171 172 174 176 177 180 181 184 185<br>236 239 240 242 243 246 247 249 250 251 252 253 254 255 256 258<br>259 260 262 263 265 266 269 |
| hTAS2R30   | 58 62 66 69 81 84 85 87 88 92 152 154 156 167 168 169 170 171 176<br>180 183 184 238 241 245 248 249 252 253 254 258 261 262 265 268<br>269                                                                                                                                                                 |
| hTAS2R31   | 8 11 12 15 16 18 19 51 54 55 58 59 62 63 65 66 67 81 82 85 86 88 89<br>90 92 93 151 171 172 173 175 180 183 184 187 188 237 238 241 249<br>250 251 253 254 255 257 258 259 260 261 262 264 265 266 269                                                                                                      |



|          |                                                                                                                                                                                                                                                                                                  |
|----------|--------------------------------------------------------------------------------------------------------------------------------------------------------------------------------------------------------------------------------------------------------------------------------------------------|
| hTAS2R38 | 18 21 22 25 71 72 74 75 76 77 78 79 80 82 83 84 86 87 91 92 95 96 99<br>100 103 165 166 167 174 178 181 183 184 185 186 187 188 189 190<br>191 194 197 198 201 256 258 259 260 262 263 266 267 268 269 270<br>274 276 278 279 280 282 283 286                                                    |
| hTAS2R43 | 5 6 9 13 58 62 63 66 69 70 71 73 76 78 79 81 82 85 88 89 91 92 142<br>143 146 147 148 150 151 152 153 154 155 156 158 160 161 166 167<br>168 169 170 171 172 175 176 179 180 183 241 242 245 248 249 252<br>253 256 257 258 259 261 262 265 266 268 269                                          |
| hTAS2R46 | 12 13 14 15 16 17 19 51 54 55 58 62 63 64 65 66 67 69 70 71 72 73 82<br>84 85 88 91 92 95 96 99 102 103 158 159 160 161 179 183 184 187<br>190 191 194 197 226 227 229 230 231 233 234 236 237 238 240 241<br>242 243 244 245 247 257 258 260 261 262 264 265 267 268 269 270<br>271 272 273 276 |
| hOR1A1   | 1 4 5 6 8 9 12 15 19 51 54 55 57 58 59 61 62 63 65 66 67 69 70 71 73<br>77 80 81 82 84 85 86 89 141 146 148 154 156 157 159 161 168 169<br>170 171 172 173 174 175 176 178 179 182 183 186 232 235 236 238<br>239 242 243 246 248 249 251 252 253 255 256 258 259 260 262                        |
| hOR2AG1  | 8 11 12 15 16 18 19 51 54 55 58 59 62 63 65 66 67 81 82 85 86 88 89<br>90 92 93 151 171 172 173 175 180 183 184 187 188 237 238 241 249<br>250 251 253 254 255 257 258 259 260 261 262 264 265 266 269                                                                                           |
| hOR2M3   | 77 80 81 84 85 88 90 97 100 101 104 105 155 156 159 160 165 171<br>176 177 178 179 180 181 182 183 189 190 191 192 194 198 199 201<br>202 203 206 256 259 269 272 273 276 277 280                                                                                                                |
| hOR7D4   | 24 27 28 31 69 70 73 77 78 81 82 84 85 86 88 101 104 105 107 108<br>111 112 159 165 175 176 179 186 187 189 190 191 192 193 194 196<br>198 199 202 203 206 207 251 252 255 256 259 262 263 266 267 268<br>269 272 273 274 275 276 277 279 280 283                                                |

## REFERENCES

- Angel, T.E., Chance, M.R., and Palczewski, K. (2009). Conserved waters mediate structural and functional activation of family A (rhodopsin-like) G protein-coupled receptors. *Proc Natl Acad Sci USA* 106(21), 8555-8560. doi: 10.1073/pnas.0903545106.
- Baker, D., and Sali, A. (2001). Protein structure prediction and structural genomics. *Science* 294(5540), 93-96. doi: 10.1126/science.1065659.
- Bakker, R.A., Jongejan, A., Sansuk, K., Hacksell, U., Timmerman, H., Brann, M.R., et al. (2008). Constitutively active mutants of the histamine H1 receptor suggest a conserved hydrophobic asparagine-cage that constrains the activation of class A G protein-coupled receptors. *Mol Pharmacol* 73(1), 94-103. doi: 10.1124/mol.107.038547.
- Baranski, T.J., Herzmark, P., Lichtarge, O., Gerber, B.O., Trueheart, J., Meng, E.C., et al. (1999). C5a receptor activation. Genetic identification of critical residues in four transmembrane helices. *J Biol Chem* 274(22), 15757-15765. doi: 10.1074/jbc.274.22.15757
- Beuming, T., and Sherman, W. (2012). Current assessment of docking into GPCR crystal structures and homology models: successes, challenges, and guidelines. *J Chem Inf Model* 52(12), 3263-3277. doi: 10.1021/ci300411b.
- Biarnes, X., Marchiori, A., Giorgetti, A., Lanzara, C., Gasparini, P., Carloni, P., et al. (2010). Insights into the binding of Phenyltiocarbamide (PTC) agonist to its target human TAS2R38 bitter receptor. *PLoS One* 5(8), e12394. doi: 10.1371/journal.pone.0012394.
- Changeux, J.P., and Edelstein, S. (2011). Conformational selection or induced fit? 50 years of debate resolved. *F1000 Biol Rep* 3, 19. doi: 10.3410/B3-19.
- Charlier, L., Topin, J., de March, C.A., Lai, P.C., Crasto, C.J., and Golebiowski, J. (2013). Molecular modelling of odorant/olfactory receptor complexes. *Methods Mol Biol* 1003, 53-65. doi: 10.1007/978-1-62703-377-0\_4.
- Chothia, C., and Lesk, A.M. (1986). The relation between the divergence of sequence and structure in proteins. *EMBO J* 5(4), 823-826.
- Colquhoun, D. (1998). Binding, gating, affinity and efficacy: the interpretation of structure-activity relationships for agonists and of the effects of mutating receptors. *Br J Pharmacol* 125(5), 924-947. doi: 10.1038/sj.bjp.0702164
- D'Antona, A.M., Ahn, K.H., Wang, L., Mierke, D.F., Lucas-Lenard, J., and Kendall, D.A. (2006). A cannabinoid receptor 1 mutation proximal to the DRY motif results in constitutive activity and reveals intramolecular interactions involved in receptor activation. *Brain Res* 1108(1), 1-11. doi: 10.1016/j.brainres.2006.05.042.
- Deupi, X., Edwards, P., Singhal, A., Nickle, B., Oprian, D., Schertler, G., et al. (2012). Stabilized G protein binding site in the structure of constitutively active metarhodopsin-II. *Proc Natl Acad Sci USA* 109(1), 119-124. doi: 10.1073/pnas.1114089108.
- Dominguez, C., Boelens, R., and Bonvin, A.M. (2003). HADDOCK: a protein-protein docking approach based on biochemical or biophysical information. *J Am Chem Soc* 125(7), 1731-1737. doi: 10.1021/ja026939x.
- Dunham, T.D., and Farrens, D.L. (1999). Conformational changes in rhodopsin. Movement of helix f detected by site-specific chemical labeling and fluorescence spectroscopy. *J Biol Chem* 274(3), 1683-1690. doi: 10.1074/jbc.274.3.1683
- Duprez, L., Parma, J., Van Sande, J., Allgeier, A., Leclere, J., Schwartz, C., et al. (1994). Germline mutations in the thyrotropin receptor gene cause non-

- autoimmune autosomal dominant hyperthyroidism. *Nat Genet* 7(3), 396-401. doi: 10.1038/ng0794-396.
- Eramian, D., Eswar, N., Shen, M.Y., and Sali, A. (2008). How well can the accuracy of comparative protein structure models be predicted? *Protein Sci* 17(11), 1881-1893. doi: 10.1110/ps.036061.108.
- Fanelli, F. (2000). Theoretical study on mutation-induced activation of the luteinizing hormone receptor. *J Mol Biol* 296(5), 1333-1351. doi: 10.1006/jmbi.2000.3516.
- Fenalti, G., Giguere, P.M., Katritch, V., Huang, X.P., Thompson, A.A., Cherezov, V., et al. (2014). Molecular control of delta-opioid receptor signalling. *Nature* 506(7487), 191-196. doi: 10.1038/nature12944.
- Friesner, R.A., Banks, J.L., Murphy, R.B., Halgren, T.A., Klicic, J.J., Mainz, D.T., et al. (2004). Glide: a new approach for rapid, accurate docking and scoring. 1. Method and assessment of docking accuracy. *J Med Chem* 47(7), 1739-1749. doi: 10.1021/jm0306430.
- Fujiwara, Y., Osborne, D.A., Walker, M.D., Wang, D.A., Bautista, D.A., Liliom, K., et al. (2007). Identification of the hydrophobic ligand binding pocket of the S1P1 receptor. *J Biol Chem* 282(4), 2374-2385. doi: 10.1074/jbc.M609648200.
- Gao, Z.G., Kim, S.K., Gross, A.S., Chen, A., Blaustein, J.B., and Jacobson, K.A. (2003). Identification of essential residues involved in the allosteric modulation of the human A(3) adenosine receptor. *Mol Pharmacol* 63(5), 1021-1031. doi: 10.1124/mol.63.5.1021
- Geithe, C., Protze, J., Kreuchwig, F., Krause, G., and Krautwurst, D. (2017). Structural determinants of a conserved enantiomer-selective carvone binding pocket in the human odorant receptor OR1A1. *Cell Mol. Life Sci*, in press. doi: 10.1007/s00018-017-2576-z
- Gelis, L., Wolf, S., Hatt, H., Neuhaus, E.M., and Gerwert, K. (2012). Prediction of a ligand-binding niche within a human olfactory receptor by combining site-directed mutagenesis with dynamic homology modeling. *Angew Chem Int Ed Engl* 51(5), 1274-1278. doi: 10.1002/anie.201103980.
- Greasley, P.J., Fanelli, F., Rossier, O., Abuin, L., and Cotecchia, S. (2002). Mutagenesis and modelling of the alpha(1b)-adrenergic receptor highlight the role of the helix 3/helix 6 interface in receptor activation. *Mol Pharmacol* 61(5), 1025-1032. DOI: <https://doi.org/10.1124/mol.61.5.1025>
- Han, M., Lou, J., Nakanishi, K., Sakmar, T.P., and Smith, S.O. (1997). Partial agonist activity of 11-cis-retinal in rhodopsin mutants. *J Biol Chem* 272(37), 23081-23085. doi: 10.1074/jbc.272.37.23081
- Ho, J., Perez-Aguilar, J.M., Gao, L., Saven, J.G., Matsunami, H., and Eckenhoff, R.G. (2015). Molecular recognition of ketamine by a subset of olfactory G protein-coupled receptors. *Sci Signal* 8(370), ra33. doi: 10.1126/scisignal.2005912.
- Holst, B., Nygaard, R., Valentin-Hansen, L., Bach, A., Engelstoft, M.S., Petersen, P.S., et al. (2010). A conserved aromatic lock for the tryptophan rotameric switch in TM-VI of seven-transmembrane receptors. *J Biol Chem* 285(6), 3973-3985. doi: 10.1074/jbc.M109.064725.
- Hulme, E.C. (2013). GPCR activation: a mutagenic spotlight on crystal structures. *Trends Pharmacol Sci* 34(1), 67-84. doi: 10.1016/j.tips.2012.11.002.
- Katritch, V., Fenalti, G., Abola, E.E., Roth, B.L., Cherezov, V., and Stevens, R.C. (2014). Allosteric sodium in class A GPCR signaling. *Trends Biochem Sci* 39(5), 233-244. doi: 10.1016/j.tibs.2014.03.002.
- Katritch, V., Rueda, M., Lam, P.C., Yeager, M., and Abagyan, R. (2010). GPCR 3D homology models for ligand screening: lessons learned from blind predictions of adenosine A2a receptor complex. *Proteins* 78(1), 197-211. doi: 10.1002/prot.22507.

- Kenakin, T. (2002). Drug efficacy at G protein-coupled receptors. *Annu Rev Pharmacol Toxicol* 42, 349-379. doi: 10.1146/annurev.pharmtox.42.091401.113012.
- Kleinau, G., Jaeschke, H., Mueller, S., Worth, C.L., Paschke, R., and Krause, G. (2008). Molecular and structural effects of inverse agonistic mutations on signaling of the thyrotropin receptor--a basally active GPCR. *Cell Mol Life Sci* 65(22), 3664-3676. doi: 10.1007/s00018-008-8450-2.
- Kosugi, S., Hai, N., Okamoto, H., Sugawa, H., and Mori, T. (2000). A novel activating mutation in the thyrotropin receptor gene in an autonomously functioning thyroid nodule developed by a Japanese patient. *Eur J Endocrinol* 143(4), 471-477. doi: 10.1530/eje.0.1430471
- Kufareva, I., Rueda, M., Katritch, V., Stevens, R.C., Abagyan, R., and participants, G.D. (2011). Status of GPCR modeling and docking as reflected by community-wide GPCR Dock 2010 assessment. *Structure* 19(8), 1108-1126. doi: 10.1016/j.str.2011.05.012.
- Labadi, A., Grassi, E.S., Gellen, B., Kleinau, G., Biebermann, H., Ruzsa, B., et al. (2015). Loss-of-Function Variants in a Hungarian Cohort Reveal Structural Insights on TSH Receptor Maturation and Signaling. *J Clin Endocrinol Metab* 100(7), E1039-1045. doi: 10.1210/jc.2014-4511.
- Lancet, D., Sadovsky, E., and Seidemann, E. (1993). Probability model for molecular recognition in biological receptor repertoires: significance to the olfactory system. *Proc Natl Acad Sci USA* 90(8), 3715-3719. doi: 10.1073/pnas.90.8.3715
- Laskowski, R.A., and Swindells, M.B. (2011). LigPlot+: multiple ligand-protein interaction diagrams for drug discovery. *J Chem Inf Model* 51(10), 2778-2786. doi: 10.1021/ci200227u.
- Latorraca, N.R., Venkatakrishnan, A.J., and Dror, R.O. (2017). GPCR Dynamics: Structures in Motion. *Chem Rev* 117(1), 139-155. doi: 10.1021/acs.chemrev.6b00177.
- Le Guilloux, V., Schmidtke, P., and Tuffery, P. (2009). Fpocket: an open source platform for ligand pocket detection. *BMC Bioinformatics* 10, 168. doi: 10.1186/1471-2105-10-168.
- Lebon, G., Bennett, K., Jazayeri, A., and Tate, C.G. (2011). Thermostabilisation of an agonist-bound conformation of the human adenosine A(2A) receptor. *J Mol Biol* 409(3), 298-310. doi: 10.1016/j.jmb.2011.03.075.
- Liu, R., Nahon, D., le Roy, B., Lenselink, E.B., and AP, I.J. (2015). Scanning mutagenesis in a yeast system delineates the role of the NPxxY(x)(5,6)F motif and helix 8 of the adenosine A(2B) receptor in G protein coupling. *Biochem Pharmacol* 95(4), 290-300. doi: 10.1016/j.bcp.2015.04.005.
- Lu, Z.L., and Hulme, E.C. (1999). The functional topography of transmembrane domain 3 of the M1 muscarinic acetylcholine receptor, revealed by scanning mutagenesis. *J Biol Chem* 274(11), 7309-7315. doi: 10.1074/jbc.274.11.7309
- Lubrano-Berthelier, C., Dubern, B., Lacorte, J.M., Picard, F., Shapiro, A., Zhang, S., et al. (2006). Melanocortin 4 receptor mutations in a large cohort of severely obese adults: prevalence, functional classification, genotype-phenotype relationship, and lack of association with binge eating. *J Clin Endocrinol Metab* 91(5), 1811-1818. doi: 10.1210/jc.2005-1411.
- Madabushi, S., Gross, A.K., Philippi, A., Meng, E.C., Wensel, T.G., and Lichtarge, O. (2004). Evolutionary trace of G protein-coupled receptors reveals clusters of residues that determine global and class-specific functions. *J Biol Chem* 279(9), 8126-8132. doi: 10.1074/jbc.M312671200.
- Marchiori, A., Capece, L., Giorgetti, A., Gasparini, P., Behrens, M., Carloni, P., et al. (2013). Coarse-Grained/Molecular Mechanics of the TAS2R38 Bitter Taste Receptor: Experimentally-Validated Detailed Structural Prediction of Agonist Binding. *Plos One* 8(5). doi: 10.1371/journal.pone.0064675.

- Martin, S.S., Holleran, B.J., Escher, E., Guillemette, G., and Leduc, R. (2007). Activation of the angiotensin II type 1 receptor leads to movement of the sixth transmembrane domain: analysis by the substituted cysteine accessibility method. *Mol Pharmacol* 72(1), 182-190. doi: 10.1124/mol.106.033670.
- Meyerhof, W., Batram, C., Kuhn, C., Brockhoff, A., Chudoba, E., Bufe, B., et al. (2010). The molecular receptive ranges of human TAS2R bitter taste receptors. *Chem Senses* 35(2), 157-170. doi: 10.1093/chemse/bjp092.
- Nishihara, E., Fukata, S., Hishinuma, A., Kudo, T., Ohye, H., Ito, M., et al. (2006). Sporadic congenital hyperthyroidism due to a germline mutation in the thyrotropin receptor gene (Leu512Gln) in a Japanese patient. *Endocr J* 53(6), 735-740. DOI: 10.1210/jcem.82.11.4378
- Nygaard, R., Valentin-Hansen, L., Mokrosinski, J., Frimurer, T.M., and Schwartz, T.W. (2010). Conserved Water-mediated Hydrogen Bond Network between TM-I, -II, -VI, and -VII in 7TM Receptor Activation. *J Biol Chem* 285(25), 19625-19636. doi: 10.1074/jbc.M110.106021.
- Parma, J., Duprez, L., Van Sande, J., Hermans, J., Rocmans, P., Van Vliet, G., et al. (1997). Diversity and prevalence of somatic mutations in the thyrotropin receptor and Gs alpha genes as a cause of toxic thyroid adenomas. *J Clin Endocrinol Metab* 82(8), 2695-2701. doi: 10.1210/jcem.82.8.4144.
- Parnot, C., Bardin, S., Miserey-Lenkei, S., Guedin, D., Corvol, P., and Clauser, E. (2000). Systematic identification of mutations that constitutively activate the angiotensin II type 1A receptor by screening a randomly mutated cDNA library with an original pharmacological bioassay. *Proc Natl Acad Sci USA* 97(13), 7615-7620. doi: 10.1073/pnas.110142297.
- Piccoli, S., Suku, E., Garonzi, M., and Giorgetti, A. (2013). Genome-wide Membrane Protein Structure Prediction. *Curr Genomics* 14(5), 324-329. doi: 10.2174/13892029113149990009.
- Porcellini, A., Ciullo, I., Laviola, L., Amabile, G., Fenzi, G., and Avvedimento, V.E. (1994). Novel mutations of thyrotropin receptor gene in thyroid hyperfunctioning adenomas. Rapid identification by fine needle aspiration biopsy. *J Clin Endocrinol Metab* 79(2), 657-661. doi: 10.1210/jcem.79.2.8045989.
- Pydi, S.P., Singh, N., Upadhyaya, J., Bhullar, R.P., and Chelikani, P. (2014). The third intracellular loop plays a critical role in bitter taste receptor activation. *Biochim Biophys Acta* 1838 (1PtB), 231-236. doi: 10.1016/j.bbamem.2013.08.009.
- Russo, D., Arturi, F., Suarez, H.G., Schlumberger, M., Du Villard, J.A., Crocetti, U., et al. (1996). Thyrotropin receptor gene alterations in thyroid hyperfunctioning adenomas. *J Clin Endocrinol Metab* 81(4), 1548-1551. doi: 10.1210/jcem.81.4.8636365.
- Russo, D., Wong, M.G., Costante, G., Chiefari, E., Treseler, P.A., Arturi, F., et al. (1999). A Val 677 activating mutation of the thyrotropin receptor in a Hurthle cell thyroid carcinoma associated with thyrotoxicosis. *Thyroid* 9(1), 13-17. doi: 10.1089/thy.1999.9.13.
- Sandal, M., Behrens, M., Brockhoff, A., Musiani, F., Giorgetti, A., Carloni, P., et al. (2015). Evidence for a Transient Additional Ligand Binding Site in the TAS2R46 Bitter Taste Receptor. *J Chem Theory Comput* 11(9), 4439-4449. doi: 10.1021/acs.jctc.5b00472.
- Sansuk, K., Deupi, X., Torrecillas, I.R., Jongejan, A., Nijmeijer, S., Bakker, R.A., et al. (2011). A structural insight into the reorientation of transmembrane domains 3 and 5 during family A G protein-coupled receptor activation. *Mol Pharmacol* 79(2), 262-269. doi: 10.1124/mol.110.066068.
- Shapiro, D.A., Kristiansen, K., Weiner, D.M., Kroeze, W.K., and Roth, B.L. (2002). Evidence for a model of agonist-induced activation of 5-hydroxytryptamine 2A serotonin receptors that involves the disruption of a strong ionic interaction

- between helices 3 and 6. *J Biol Chem* 277(13), 11441-11449. doi: 10.1074/jbc.M111675200.
- Singh, N., Pydi, S.P., Upadhyaya, J., and Chelikani, P. (2011). Structural basis of activation of bitter taste receptor T2R1 and comparison with Class A G-protein-coupled receptors (GPCRs). *J Biol Chem* 286(41), 36032-36041. doi: 10.1074/jbc.M111.246983.
- Spalding, T.A., Burstein, E.S., Henderson, S.C., Ducote, K.R., and Brann, M.R. (1998). Identification of a ligand-dependent switch within a muscarinic receptor. *J Biol Chem* 273(34), 21563-21568. doi: 10.1074/jbc.273.34.21563
- Spyrakis, F., Bidon-Chanal, A., Barril, X., and Luque, F.J. (2011). Protein flexibility and ligand recognition: challenges for molecular modeling. *Arch Biochem Biophys* 11(2), 192-210. doi: 10.2174/156802611794863571
- Spyrakis, F., and Cavasotto, C.N. (2015). Open challenges in structure-based virtual screening: Receptor modeling, target flexibility consideration and active site water molecules description. *Arch Biochem Biophys* 583, 105-119. doi: 10.1016/j.abb.2015.08.002.
- Strange, P.G. (2008). Agonist binding, agonist affinity and agonist efficacy at G protein-coupled receptors. *Br J Pharmacol* 153(7), 1353-1363. doi: 10.1038/sj.bjp.0707672.
- Strange, P.G. (2010). Use of the GTPgammaS ([35S]GTPgammaS and Eu-GTPgammaS) binding assay for analysis of ligand potency and efficacy at G protein-coupled receptors. *Br J Pharmacol* 161(6), 1238-1249. doi: 10.1111/j.1476-5381.2010.00963.x.
- Tao, Y.X. (2008). Constitutive activation of G protein-coupled receptors and diseases: insights into mechanisms of activation and therapeutics. *Pharmacol Ther* 120(2), 129-148. doi: 10.1016/j.pharmthera.2008.07.005.
- Tao, Y.X., Abell, A.N., Liu, X., Nakamura, K., and Segaloff, D.L. (2000). Constitutive activation of G protein-coupled receptors as a result of selective substitution of a conserved leucine residue in transmembrane helix III. *Mol Endocrinol* 14(8), 1272-1282. doi: 10.1210/mend.14.8.0503.
- Tate, C.G., and Schertler, G.F. (2009). Engineering G protein-coupled receptors to facilitate their structure determination. *Curr Opin Struct Biol* 19(4), 386-395. doi: 10.1016/j.sbi.2009.07.004.
- Tonacchera, M., Chiovato, L., Pinchera, A., Agretti, P., Fiore, E., Cetani, F., et al. (1998). Hyperfunctioning thyroid nodules in toxic multinodular goiter share activating thyrotropin receptor mutations with solitary toxic adenoma. *J Clin Endocrinol Metab* 83(2), 492-498. doi: 10.1210/jcem.83.2.4559.
- Trott, O., and Olson, A.J. (2010). AutoDock Vina: improving the speed and accuracy of docking with a new scoring function, efficient optimization, and multithreading. *J Comput Chem* 31(2), 455-461. doi: 10.1002/jcc.21334.
- Trulzsch, B., Krohn, K., Wonerow, P., Chey, S., Holzapfel, H.P., Ackermann, F., et al. (2001). Detection of thyroid-stimulating hormone receptor and Gsalpha mutations: in 75 toxic thyroid nodules by denaturing gradient gel electrophoresis. *J Mol Med (Berl)* 78(12), 684-691. DOI: 10.1007/s001090000170
- Urizar, E., Claeysen, S., Deupi, X., Govaerts, C., Costagliola, S., Vassart, G., et al. (2005). An activation switch in the rhodopsin family of G protein-coupled receptors: the thyrotropin receptor. *J Biol Chem* 280(17), 17135-17141. doi: 10.1074/jbc.M414678200.
- Vaisse, C., Clement, K., Durand, E., Hercberg, S., Guy-Grand, B., and Froguel, P. (2000). Melanocortin-4 receptor mutations are a frequent and heterogeneous cause of morbid obesity. *J Clin Invest* 106(2), 253-262. doi: 10.1172/JCI9238.
- Valentin-Hansen, L., Holst, B., Frimurer, T.M., and Schwartz, T.W. (2012). PheVI:09 (Phe6.44) as a sliding microswitch in seven-transmembrane (7TM) G protein-

- coupled receptor activation. *J Biol Chem* 287(52), 43516-43526. doi: 10.1074/jbc.M112.395137.
- Venkatakrishnan, A.J., Deupi, X., Lebon, G., Heydenreich, F.M., Flock, T., Miljus, T., et al. (2016). Diverse activation pathways in class A GPCRs converge near the G-protein-coupling region. *Nature* 536(7617), 484-487. doi: 10.1038/nature19107.
- Venkatakrishnan, A.J., Deupi, X., Lebon, G., Tate, C.G., Schertler, G.F., and Babu, M.M. (2013). Molecular signatures of G-protein-coupled receptors. *Nature* 494(7436), 185-194. doi: 10.1038/nature11896.
- Williams, C., and Hill, S.J. (2009). GPCR signaling: understanding the pathway to successful drug discovery. *Methods Mol Biol* 552, 39-50. doi: 10.1007/978-1-60327-317-6\_3.
- Xu, W., Ozdener, F., Li, J.G., Chen, C., de Riel, J.K., Weinstein, H., et al. (1999). Functional role of the spatial proximity of Asp114(2.50) in TMH 2 and Asn332(7.49) in TMH 7 of the mu opioid receptor. *FEBS Lett* 447(2-3), 318-324. DOI: 10.1016/S0014-5793(99)00316-6
- V Isberg, C de Graaf, A Bortolato, V Cherezov, V Katritch, F Marshall, S Mordalski, et al. (2015). Generic GPCR Residue Numbers - Aligning Topology Maps While Minding The Gaps", *Trends Pharmacol Sci*, 36(1), 22–31. doi: 10.1016/j.tips.2014.11.001
